# Supplementary material for: Interaction effects of significant risk factors on low bone mineral density in ankylosing spondylitis
Source: PeerJ journal article supplement (doi:10.7717/peerj.16448), 2023-11-22
Supplement: Questionnaire.zip [file Questionnaire.zip]

|        |    |
|--------|----|
| 患者姓名缩写 | 编号 |
|--------|----|

## 中日友好医院课题

强直性脊柱炎患者放射学特征及进展影响因素和中药干预  
作用的长期队列研究

## 病例报告表初查

(Case Report Form)

队列研究  
版本号: 20170702

时间: \_\_\_\_\_

患者姓名缩写: \_\_\_\_\_

研究者签名: \_\_\_\_\_

研究负责人签名: \_\_\_\_\_

卫生部中日友好医院

### 填写说明

1. 本表格请用蓝黑色或黑色钢笔或签字笔填写，不得用铅笔填写。
2. 筛选合格者填写本表。
3. 需要选择的项目前面有□，请在□上划“√”即可。
4. 表格中各项内容应认真、如实填写，不得随意涂改。如果填写错误，更改处不能涂黑，只能在更改处居中划一横线，并签署修改者姓名和修改时间。
5. 受试者姓名拼音缩写四格需填满，两字姓名填写拼音前两个字母；三字姓名填写三字首字母及第三字第二个字母；四字姓名填写每一个字的第一个字母，如：王涛 WATA，刘淑英 LSYI；欧阳绿萍 OYLP。
6. 实验室检查表格中“检查日期”一栏按照化验单上打印的检验日期填写。检查值一项直接填写本研究中心化验报告单上的结果即可，不需注明单位。
7. 所有检验项目因故未查或漏查，请填写 ND；具体用药剂量和时间不明，请填写 NK。
8. 应如实填写不良事件记录表，如有严重不良事件发生，请及时上报本中心研究负责人。

研究负责单位：卫生部中日友好医院

联系人：孔维萍

电话：010—84205067

传真：010—84205152

|                                 |                                                    |      |
|---------------------------------|----------------------------------------------------|------|
| 患者姓名拼音字母<br><br><div>□□□□</div> | 就诊日期<br><br> _ _ _ _ / _ _ _ / _ _ _ <br><br>年 月 日 | 病例筛选 |
|---------------------------------|----------------------------------------------------|------|

表 1 一般情况

|                                                               |                                                         |    |                                                         |                                                                                                                 |                                                       |
|---------------------------------------------------------------|---------------------------------------------------------|----|---------------------------------------------------------|-----------------------------------------------------------------------------------------------------------------|-------------------------------------------------------|
| 姓名                                                            |                                                         |    | 受试者姓名首字母                                                | ____ _                                                                                                          |                                                       |
| 年龄                                                            | 岁                                                       |    | 性别                                                      | <input type="checkbox"/> 男                                                                                      | <input type="checkbox"/> 女                            |
| 民族                                                            |                                                         |    | 出生日期                                                    | 年 月 日                                                                                                           |                                                       |
| 发病年龄                                                          | 岁                                                       | 病程 | 月                                                       | AS 家族史                                                                                                          | <input type="checkbox"/> 是 <input type="checkbox"/> 否 |
| 发病形式                                                          | <input type="checkbox"/> 急性 <input type="checkbox"/> 慢性 |    |                                                         |                                                                                                                 |                                                       |
| 首发部位                                                          |                                                         |    |                                                         |                                                                                                                 |                                                       |
| <input type="checkbox"/> 门诊 <input type="checkbox"/> 住院(病案号 ) |                                                         |    | 婚姻情况                                                    | <input type="checkbox"/> 已婚 <input type="checkbox"/> 未婚 <input type="checkbox"/> 离异 <input type="checkbox"/> 丧偶 |                                                       |
| HLA-B27:                                                      |                                                         |    | <input type="checkbox"/> 阴性 <input type="checkbox"/> 阳性 |                                                                                                                 |                                                       |

表 2 1984 年修订的强直性脊柱炎纽约标准

|                                                              |                                                             |
|--------------------------------------------------------------|-------------------------------------------------------------|
| 临床标准                                                         | ①腰痛、晨僵 3 个月以上，活动改善，休息无改善；②腰椎额状面和矢状面活动受限；③胸廓活动度低于相应年龄、性别正常人。 |
| 放射学标准                                                        | 骶髂关节炎分级见上：双侧≥ II 级或单侧III—IV级骶髂关节炎。                          |
| 诊 断                                                          | 肯定 AS：符合放射学标准和 1 项（及以上）临床标准者                                |
| 符合诊断标准 <input type="checkbox"/> 是 <input type="checkbox"/> 否 |                                                             |

表 3 2009 修订的中轴型 SPA 分类标准、2011 年修订的外周型 SPA 分类标准

| 2009 年修订的中轴型 SpA 分类标准 |                                                                                                                          |
|-----------------------|--------------------------------------------------------------------------------------------------------------------------|
| 临床标准                  | 腰背痛 $\geq 3$ 个月且发病年龄小于 45 岁的患者                                                                                           |
| SpA 特征                | 1. 炎性腰背痛 2. 关节炎 3. 肌腱附着点炎 4. 葡萄膜炎 5. 指（趾）炎 6. 银屑病 7. 克罗恩病 / 溃疡性结肠炎 8. NSAID 治疗有效 9. 具有 SpA 家族史 10. HLA-B27 阳性 11. CRP 升高 |
| 诊断标准                  | 影像学证实骶髂关节炎且具有 $\geq 1$ 个 SpA 特征或 HLA-B27 阳性且具有 $\geq 2$ 个 SpA 特征                                                         |
| 是否符合诊断标准              | <input type="checkbox"/> 是 <input type="checkbox"/> 否                                                                    |
| 2011 年修订的外周型 SPA 分类标准 |                                                                                                                          |
| 临床标准                  | 关节炎或附着点炎或指（趾）炎                                                                                                           |
| SpA 特征 1              | 1. 银屑病 2. 炎性肠病 3. 前驱感染 4. HLA-B27 阳性 5. 葡萄膜炎 6. 骶髂关节炎影像学证据（X 线或 MRI）                                                     |
| SpA 特征 2              | 1. 关节炎 2. 起止点炎 3. 指（趾）炎 4. IBP 既往史 5. SpA 家族史                                                                            |
| 诊断标准                  | 临床标准加上 $\geq 1$ 条 SpA 特征 1 或加上 $\geq 2$ 条 SpA 特征 2                                                                       |
| 是否符合诊断标准              | <input type="checkbox"/> 是 <input type="checkbox"/> 否                                                                    |

表 4 入选标准、排除标准

| 入选标准                                                           | 是                        | 否                        |
|----------------------------------------------------------------|--------------------------|--------------------------|
| 1 符合美国风湿学会 1984 年修订的强直性脊柱炎纽约标准；（见上表）                           | <input type="checkbox"/> | <input type="checkbox"/> |
| 2 符合 2009 年 ASAS 的中轴型 SpA 的分类标准，或符合 2011 年 ASAS 的外周型 SpA 分类标准。 |                          |                          |
| 3 符合中医证候诊断标准；（见上表）                                             | <input type="checkbox"/> | <input type="checkbox"/> |
| 4 年龄>16岁者；                                                     | <input type="checkbox"/> | <input type="checkbox"/> |
| 5 自愿作为受试对象，签署知情同意书；                                            | <input type="checkbox"/> | <input type="checkbox"/> |
| 如以上任何一个答案为“否”，此受试者不能参加试验                                       |                          |                          |
| 排除标准                                                           | 是                        | 否                        |
| 1 不符合上述纳入标准者；                                                  | <input type="checkbox"/> | <input type="checkbox"/> |
| 2 妊娠或哺乳期妇女及精神病患者，严重感染者，合并重度营养不良，或伴有心、脑、肾、造血系统严重损害              |                          |                          |
| 如以上任何一个答案为“是”，此受试者不能参加试验                                       |                          |                          |

筛查合格：☐ 是 ☐ 否是否签署知情同意书：☐ 是 ☐ 否

入组日期：\_\_ \_\_ \_\_ \_\_ 年 \_\_ \_\_ 月 \_\_ \_\_ 日

研究者签名：\_\_\_\_\_

|                      |                                                |            |
|----------------------|------------------------------------------------|------------|
| 患者姓名拼音字母<br><br>□□□□ | 就诊日期<br> _ _ _ _ / _ _ _ _ / _ _ _ _ <br>年 月 日 | 访视一<br>0 周 |
|----------------------|------------------------------------------------|------------|

表 1 背景信息

1、您的髋部或背部疼痛出现的时间？

\_\_\_ \_\_\_/\_\_\_ \_\_\_/\_\_\_ \_\_\_ \_\_\_

2、诊断强直性脊柱炎的时间。

\_\_\_ \_\_\_/\_\_\_ \_\_\_/\_\_\_ \_\_\_ \_\_\_

3. 您是否曾使用过以下药物：

药品名称

|       |   |   |     |
|-------|---|---|-----|
| 柳氮磺吡啶 | 是 | 否 | 不知道 |
| 甲氨蝶呤  | 是 | 否 | 不知道 |
| 硫唑嘌呤  | 是 | 否 | 不知道 |
| 麦考酚酸酯 | 是 | 否 | 不知道 |
| 羟氯喹   | 是 | 否 | 不知道 |
| 强的松   | 是 | 否 | 不知道 |
| 唑来膦酸  | 是 | 否 | 不知道 |
| 伊班膦酸  | 是 | 否 | 不知道 |
| 阿仑膦酸盐 | 是 | 否 | 不知道 |
| 利塞膦酸盐 | 是 | 否 | 不知道 |

4. 您是否使用过以下生物制剂?

|        |   |   |     | 开始时间  | 停止时间  |
|--------|---|---|-----|-------|-------|
| 英夫利昔单抗 | 是 | 否 | 不知道 | _____ | _____ |
| 依那西普   | 是 | 否 | 不知道 | _____ | _____ |
| 阿达木单抗  | 是 | 否 | 不知道 | _____ | _____ |
| 戈利木单抗  | 是 | 否 | 不知道 | _____ | _____ |
| 赛妥珠单抗  | 是 | 否 | 不知道 | _____ | _____ |
| 其他生物制剂 | 是 | 否 | 不知道 | _____ | _____ |
| 益赛普    | 是 | 否 | 不知道 | _____ | _____ |
| 强克     | 是 | 否 | 不知道 | _____ | _____ |

5a: 您是否吸烟超过 100 支? 是 否 不知道

5b: 您开始吸烟的时间? \_\_\_\_\_ 您戒烟的时间? \_\_\_\_\_

6、您现在是否吸烟? 是 每天多少支? 否 您以前每天吸多少支?

## 7. 您有下面的病症吗？

| 病症            | 有 | 无 | 不知道 | 最早出现症状的年份及月份 | 诊断的年份及月份 |
|---------------|---|---|-----|--------------|----------|
| 虹膜炎/葡萄膜炎      |   |   |     |              |          |
| 银屑病           |   |   |     |              |          |
| 反应性关节炎/莱特尔综合征 |   |   |     |              |          |
| 溃疡性结肠炎        |   |   |     |              |          |
| 克罗丁           |   |   |     |              |          |
| 跟腱炎/足底筋膜炎     |   |   |     |              |          |
| 关节炎*          |   |   |     |              |          |
| 背部僵直疼痛        |   |   |     |              |          |
| 跟痛症           |   |   |     |              |          |

\* 除去腰椎和髋关节

如果有该病症，请填写其最早出现症状及诊断的年份、月份。



表 3 测量表

身高：        厘米        体重：        千克

度量 BIM 公式：                      Kg/cm<sup>2</sup> （千克/厘米<sup>2</sup>）

腰围：        厘米        血压：        /        心率：        次/分

|            |                                             |             |            |
|------------|---------------------------------------------|-------------|------------|
| 髋关节        | 髋关节内旋                                       | 髋关节外旋       | 总髋关节旋转度    |
| 右          | °        +        °        =        °       |             |            |
| 左          | °        +        °        =        °       |             |            |
| 颈椎         | 右                                           | 左           | 总颈椎旋转度     |
| 颈椎旋转       | °        +        °        =        °       |             |            |
| 颈椎侧弯       | °        +        °        =        °       |             |            |
| 侧腰弯曲       | 直立时指尖到地面的距离                                 | 弯腰时指尖到地面的距离 | 总侧腰弯曲度     |
| 右          | cm        —        cm        =        cm    |             |            |
| 左          | cm        —        cm        =        cm    |             |            |
| 枕墙距        | cm                                          | 胸廓活动度       | cm         |
|            | 弯腰                                          | 直立          | Schober 评分 |
| Schober 试验 | cm        —        10 cm        =        cm |             |            |

|       |  |
|-------|--|
| 最大踝间距 |  |
|-------|--|

肌腱端指数测量表

|        |    |   |    |   |
|--------|----|---|----|---|
|        | 疼痛 |   |    |   |
|        | 无  |   | 有  |   |
| C1-2   |    |   |    |   |
| C7-T1  |    |   |    |   |
| T12-L1 |    |   |    |   |
| L5-S1  |    |   |    |   |
|        | 右  |   | 左  |   |
|        | 疼痛 |   | 疼痛 |   |
|        | 无  | 有 | 无  | 有 |
| 大转子    |    |   |    |   |
| 膝关节内收  |    |   |    |   |
| 髌前上棘   |    |   |    |   |
| 坐骨结节   |    |   |    |   |
| 跟腱插入   |    |   |    |   |
| 足底插入   |    |   |    |   |

总肌腱端评分：

关节肿胀疼痛指数

| 关节<br><br>(圈出合适的答案) | 右  |   |    |   |  | 左  |   |    |   |
|---------------------|----|---|----|---|--|----|---|----|---|
|                     | 疼痛 |   | 肿胀 |   |  | 疼痛 |   | 肿胀 |   |
|                     | 无  | 有 | 无  | 有 |  | 无  | 有 | 无  | 有 |
| 胸锁关节                | 0  | 1 | 0  | 1 |  | 0  | 1 | 0  | 1 |
| 肩锁关节                | 0  | 1 | 0  | 1 |  | 0  | 1 | 0  | 1 |
| 肩关节                 | 0  | 1 | 0  | 1 |  | 0  | 1 | 0  | 1 |
| 肘关节                 | 0  | 1 | 0  | 1 |  | 0  | 1 | 0  | 1 |
| 腕关节                 | 0  | 1 | 0  | 1 |  | 0  | 1 | 0  | 1 |
| 第一掌指关节              | 0  | 1 | 0  | 1 |  | 0  | 1 | 0  | 1 |
| 第二掌指关节              | 0  | 1 | 0  | 1 |  | 0  | 1 | 0  | 1 |
| 第三掌指关节              | 0  | 1 | 0  | 1 |  | 0  | 1 | 0  | 1 |
| 第四掌指关节              | 0  | 1 | 0  | 1 |  | 0  | 1 | 0  | 1 |
| 第五掌指关节              | 0  | 1 | 0  | 1 |  | 0  | 1 | 0  | 1 |
| 拇指指间关节              | 0  | 1 | 0  | 1 |  | 0  | 1 | 0  | 1 |

|        |   |   |   |   |  |   |   |   |   |
|--------|---|---|---|---|--|---|---|---|---|
| 第二指间关节 | 0 | 1 | 0 | 1 |  | 0 | 1 | 0 | 1 |
| 第三指间关节 | 0 | 1 | 0 | 1 |  | 0 | 1 | 0 | 1 |
| 第四指间关节 | 0 | 1 | 0 | 1 |  | 0 | 1 | 0 | 1 |
| 第五指间关节 | 0 | 1 | 0 | 1 |  | 0 | 1 | 0 | 1 |
| 膝关节    | 0 | 1 | 0 | 1 |  | 0 | 1 | 0 | 1 |
| 踝关节    | 0 | 1 | 0 | 1 |  | 0 | 1 | 0 | 1 |
| 第一跖趾关节 | 0 | 1 | 0 | 1 |  | 0 | 1 | 0 | 1 |
| 第二跖趾关节 | 0 | 1 | 0 | 1 |  | 0 | 1 | 0 | 1 |
| 第三跖趾关节 | 0 | 1 | 0 | 1 |  | 0 | 1 | 0 | 1 |
| 第四跖趾关节 | 0 | 1 | 0 | 1 |  | 0 | 1 | 0 | 1 |
| 第五跖趾关节 | 0 | 1 | 0 | 1 |  | 0 | 1 | 0 | 1 |
| 髋关节    | 0 | 1 | 0 | 0 |  | 0 | 1 | 0 | 0 |

MD Global Assessment of Arthritis Activity

不活跃 ----- 非常活跃  
0 100

表 4 关节活动情况问卷（AAQ）

疼痛数字评分量表（NRS）

请您根据过去一周关节的活动情况打分，分值从 0 到 10 对应完成该项活动由易到难

| 过去一周关节活动项目               | 分值 |
|--------------------------|----|
| 1. 可以不用帮助自己穿上袜子或系鞋带      |    |
| 2. 可以不用帮助弯腰拾起跟前掉落的笔。     |    |
| 3. 可以不用帮助摸到柜子的顶部         |    |
| 4. 可以不用帮助也不用手从椅子上坐着站起。   |    |
| 5. 不需要借助背的力量平躺着站起来       |    |
| 6. 不借助外界支撑站立 10 分钟而无不适   |    |
| 7. 不借助拐杖等助走工具爬 12-15 级台阶 |    |
| 8. 转头看肩不需要转动身体           |    |
| 9. 经常做家务                 |    |
| 10. 工作或者做家务能坚持一天而无不适     |    |

疼痛情况

分值由 0 到 10 代表疼痛程度由零到严重

|                         | 分值 |
|-------------------------|----|
| 1. 过去一周，强直性脊柱炎给你带来的疼痛程度 |    |
| 2. 过去一周，夜间脊柱疼痛的程度       |    |

自我感觉

请根据过去一周的情况，在相应的位置填写

|                   | 很少或几乎不<br>( <1 天 ) | 有点或有些时候<br>( 1-2 天 ) | 经常或很多时候<br>( 3-4 天 ) | 总是<br>( 5-7 天 ) |
|-------------------|--------------------|----------------------|----------------------|-----------------|
| 1. 我会为以前不困扰的事情而烦恼 |                    |                      |                      |                 |
| 2. 不想吃东西，食欲差      |                    |                      |                      |                 |
| 3. 负面情绪无法排解       |                    |                      |                      |                 |
| 4. 感觉自己和其他人没什么不一样 |                    |                      |                      |                 |
| 5. 不能集中注意力        |                    |                      |                      |                 |
| 6. 感觉压抑，抑郁        |                    |                      |                      |                 |

|                |  |  |  |  |
|----------------|--|--|--|--|
| 7. 做什么事都很费力    |  |  |  |  |
| 8. 对未来充满希望     |  |  |  |  |
| 9. 感觉自己的生活一塌糊涂 |  |  |  |  |
| 10. 感到害怕       |  |  |  |  |
| 11. 晚上睡不安稳     |  |  |  |  |
| 12. 感到快乐       |  |  |  |  |
| 13. 说话比平时要少    |  |  |  |  |
| 14. 感到孤独       |  |  |  |  |
| 15. 感觉别人不友善    |  |  |  |  |
| 16. 很享受生活      |  |  |  |  |



|               |  |  |  |  |
|---------------|--|--|--|--|
| 17. 有时会想哭     |  |  |  |  |
| 18. 感到悲伤      |  |  |  |  |
| 19. 感觉别人不喜欢自己 |  |  |  |  |
| 20. 没有前进的动力   |  |  |  |  |

### 脊柱活动

请根据上一周脊柱活动情况打分，分值从 0 到 10 代表脊柱活动从严重受限到不受限。

|      |   |   |   |   |   |   |   |   |   |   |    |     |
|------|---|---|---|---|---|---|---|---|---|---|----|-----|
| 严重受限 | 0 | 1 | 2 | 3 | 4 | 5 | 6 | 7 | 8 | 9 | 10 | 不受限 |
|------|---|---|---|---|---|---|---|---|---|---|----|-----|

### 其他情况

请根据过去的一周情况打分，分值从 0 到 10 代表程度从无到严重，

| 其他情况                                   | 分值 |
|----------------------------------------|----|
| 1. 请为你所感到的疲劳程度评分                       |    |
| 2. 请为你感到的颈部，背部和髋部的疼痛评分                 |    |
| 3. 请为你的关节疼痛或肿胀程度评分（除去颈部，背部和髋部的关节）      |    |
| 4. 请为其他部位的触痛和压痛评分                      |    |
| 5. 请为晨僵的程度评分                           |    |
| 6. 晨僵持续时间（分值从 0 到 10 代表从无到 2h 及 2h 以上） |    |

表 5 其他疾病情况

除了强直性脊柱炎外，医生是否告知您同时患有其他疾病？

心血管疾病

|           |                            |                            |                              |
|-----------|----------------------------|----------------------------|------------------------------|
| 冠心病       | <input type="checkbox"/> 有 | <input type="checkbox"/> 无 | <input type="checkbox"/> 不清楚 |
| 心力衰竭      | <input type="checkbox"/> 有 | <input type="checkbox"/> 无 | <input type="checkbox"/> 不清楚 |
| 充血性心力衰竭   | <input type="checkbox"/> 有 | <input type="checkbox"/> 无 | <input type="checkbox"/> 不清楚 |
| 胸痛        | <input type="checkbox"/> 有 | <input type="checkbox"/> 无 | <input type="checkbox"/> 不清楚 |
| 高血压       | <input type="checkbox"/> 有 | <input type="checkbox"/> 无 | <input type="checkbox"/> 不清楚 |
| 房颤        | <input type="checkbox"/> 有 | <input type="checkbox"/> 无 | <input type="checkbox"/> 不清楚 |
| 传导阻滞或心律失常 | <input type="checkbox"/> 有 | <input type="checkbox"/> 无 | <input type="checkbox"/> 不清楚 |
| 心脏瓣膜疾病    | <input type="checkbox"/> 有 | <input type="checkbox"/> 无 | <input type="checkbox"/> 不清楚 |

如果有，请问是哪片瓣膜出现问题？\_\_\_\_\_

|        |                            |                            |                              |
|--------|----------------------------|----------------------------|------------------------------|
| 心脏瓣膜置换 | <input type="checkbox"/> 有 | <input type="checkbox"/> 无 | <input type="checkbox"/> 不清楚 |
|--------|----------------------------|----------------------------|------------------------------|

如果有，请问置换了哪片瓣膜？\_\_\_\_\_

|                 |                            |                            |                              |
|-----------------|----------------------------|----------------------------|------------------------------|
| 心脏搭桥手术          | <input type="checkbox"/> 有 | <input type="checkbox"/> 无 | <input type="checkbox"/> 不清楚 |
| 心脏动脉支架          | <input type="checkbox"/> 有 | <input type="checkbox"/> 无 | <input type="checkbox"/> 不清楚 |
| 中风或脑血管疾病或短暂性脑缺血 | <input type="checkbox"/> 有 | <input type="checkbox"/> 无 | <input type="checkbox"/> 不清楚 |
| 其他              | _____                      |                            |                              |

呼吸系统疾病

|        |                            |                            |                              |
|--------|----------------------------|----------------------------|------------------------------|
| 肺气肿    | <input type="checkbox"/> 有 | <input type="checkbox"/> 无 | <input type="checkbox"/> 不清楚 |
| 慢性支气管炎 | <input type="checkbox"/> 有 | <input type="checkbox"/> 无 | <input type="checkbox"/> 不清楚 |
| 哮喘     | <input type="checkbox"/> 有 | <input type="checkbox"/> 无 | <input type="checkbox"/> 不清楚 |
| 睡眠呼吸暂停 | <input type="checkbox"/> 有 | <input type="checkbox"/> 无 | <input type="checkbox"/> 不清楚 |
| 其他     | _____                      |                            |                              |

恶性肿瘤

|       |                            |                            |                              |
|-------|----------------------------|----------------------------|------------------------------|
| 淋巴瘤   | <input type="checkbox"/> 有 | <input type="checkbox"/> 无 | <input type="checkbox"/> 不清楚 |
| 白血病   | <input type="checkbox"/> 有 | <input type="checkbox"/> 无 | <input type="checkbox"/> 不清楚 |
| 黑色素瘤  | <input type="checkbox"/> 有 | <input type="checkbox"/> 无 | <input type="checkbox"/> 不清楚 |
| 基底细胞癌 | <input type="checkbox"/> 有 | <input type="checkbox"/> 无 | <input type="checkbox"/> 不清楚 |
| 鳞状细胞癌 | <input type="checkbox"/> 有 | <input type="checkbox"/> 无 | <input type="checkbox"/> 不清楚 |
| 其他    | _____                      |                            |                              |

骨科

|                              |                            |                            |                              |
|------------------------------|----------------------------|----------------------------|------------------------------|
| 骨折                           | <input type="checkbox"/> 有 | <input type="checkbox"/> 无 | <input type="checkbox"/> 不清楚 |
| 如果有，请填写骨折原因：_____ 骨折时间：_____ |                            |                            |                              |
| 骨折部位：_____ 是否伴有外伤：_____      |                            |                            |                              |
| 骨质疏松                         | <input type="checkbox"/> 有 | <input type="checkbox"/> 无 | <input type="checkbox"/> 不清楚 |
| 截肢                           | <input type="checkbox"/> 有 | <input type="checkbox"/> 无 | <input type="checkbox"/> 不清楚 |
| 其他                           | _____                      |                            |                              |

**胃肠道疾病**

|          |                            |                            |                              |
|----------|----------------------------|----------------------------|------------------------------|
| 胃溃疡      | <input type="checkbox"/> 有 | <input type="checkbox"/> 无 | <input type="checkbox"/> 不清楚 |
| 憩室炎      | <input type="checkbox"/> 有 | <input type="checkbox"/> 无 | <input type="checkbox"/> 不清楚 |
| 胆囊疾病     | <input type="checkbox"/> 有 | <input type="checkbox"/> 无 | <input type="checkbox"/> 不清楚 |
| 肝脏疾病或肝硬化 | <input type="checkbox"/> 有 | <input type="checkbox"/> 无 | <input type="checkbox"/> 不清楚 |
| 痢疾       | <input type="checkbox"/> 有 | <input type="checkbox"/> 无 | <input type="checkbox"/> 不清楚 |
| 便秘       | <input type="checkbox"/> 有 | <input type="checkbox"/> 无 | <input type="checkbox"/> 不清楚 |
| 鼓胀       | <input type="checkbox"/> 有 | <input type="checkbox"/> 无 | <input type="checkbox"/> 不清楚 |
| 食管返流     | <input type="checkbox"/> 有 | <input type="checkbox"/> 无 | <input type="checkbox"/> 不清楚 |
| 其他       |                            |                            |                              |

**神经系统疾病**

|         |                            |                            |                              |
|---------|----------------------------|----------------------------|------------------------------|
| 帕金森病    | <input type="checkbox"/> 有 | <input type="checkbox"/> 无 | <input type="checkbox"/> 不清楚 |
| 阿尔兹海默病  | <input type="checkbox"/> 有 | <input type="checkbox"/> 无 | <input type="checkbox"/> 不清楚 |
| 半身不遂    | <input type="checkbox"/> 有 | <input type="checkbox"/> 无 | <input type="checkbox"/> 不清楚 |
| 脊髓受损    | <input type="checkbox"/> 有 | <input type="checkbox"/> 无 | <input type="checkbox"/> 不清楚 |
| 马尾神经综合征 | <input type="checkbox"/> 有 | <input type="checkbox"/> 无 | <input type="checkbox"/> 不清楚 |
| 外周神经病变  | <input type="checkbox"/> 有 | <input type="checkbox"/> 无 | <input type="checkbox"/> 不清楚 |
| 头痛或偏头痛  | <input type="checkbox"/> 有 | <input type="checkbox"/> 无 | <input type="checkbox"/> 不清楚 |
| 其他      |                            |                            |                              |

**其他疾病**

|        |                            |                            |                              |
|--------|----------------------------|----------------------------|------------------------------|
| 抑郁     | <input type="checkbox"/> 有 | <input type="checkbox"/> 无 | <input type="checkbox"/> 不清楚 |
| 糖尿病    | <input type="checkbox"/> 有 | <input type="checkbox"/> 无 | <input type="checkbox"/> 不清楚 |
| 青光眼    | <input type="checkbox"/> 有 | <input type="checkbox"/> 无 | <input type="checkbox"/> 不清楚 |
| 白内障    | <input type="checkbox"/> 有 | <input type="checkbox"/> 无 | <input type="checkbox"/> 不清楚 |
| 淀粉样变性  | <input type="checkbox"/> 有 | <input type="checkbox"/> 无 | <input type="checkbox"/> 不清楚 |
| 肾结石    | <input type="checkbox"/> 有 | <input type="checkbox"/> 无 | <input type="checkbox"/> 不清楚 |
| IgA 肾病 | <input type="checkbox"/> 有 | <input type="checkbox"/> 无 | <input type="checkbox"/> 不清楚 |
| 超重或肥胖症 | <input type="checkbox"/> 有 | <input type="checkbox"/> 无 | <input type="checkbox"/> 不清楚 |
| 器官移植   | <input type="checkbox"/> 有 | <input type="checkbox"/> 无 | <input type="checkbox"/> 不清楚 |

如果有, 请填写移植时间: \_\_\_\_\_ 移植器官: \_\_\_\_\_ 移植原因: \_\_\_\_\_

其他 \_\_\_\_\_

表 6 药物使用情况登记表

在过去的 6 个月内，您是否服用药物？ ☐ 是 ☐ 否

请将您服用的所有药物列出来（所有的处方和非处方药）

口服药物如：抗炎药物如阿司匹林，萘普生，扶他林，布洛芬或吡罗昔康及中药、中成药等

注射或静脉滴注的药物如：益赛普，伐利木单抗，英利昔单抗或赛妥珠单抗

| 药物名称<br>(请写通用名称) | 每片/每次注射/每<br>次点滴多少毫克(毫<br>升) | 过去六个月内<br>服药几个月 | 上月服药多少天<br>(片剂) | 上周服药多少天<br>(片剂) | 每日服用量<br>(片剂) | 每周注射量<br>(注射或滴注) | 每个月注射量<br>(注射或滴注) | 是否仍在服用 |
|------------------|------------------------------|-----------------|-----------------|-----------------|---------------|------------------|-------------------|--------|
|                  |                              |                 |                 |                 |               |                  |                   |        |
|                  |                              |                 |                 |                 |               |                  |                   |        |
|                  |                              |                 |                 |                 |               |                  |                   |        |
|                  |                              |                 |                 |                 |               |                  |                   |        |
|                  |                              |                 |                 |                 |               |                  |                   |        |
|                  |                              |                 |                 |                 |               |                  |                   |        |
|                  |                              |                 |                 |                 |               |                  |                   |        |
|                  |                              |                 |                 |                 |               |                  |                   |        |
|                  |                              |                 |                 |                 |               |                  |                   |        |

表 7 检验检查(见下页)

| 检查日期      | 检查项目             | 具体值                                                                                                    |  | 是否异常                                                  | 是否有临床意义                                               |
|-----------|------------------|--------------------------------------------------------------------------------------------------------|--|-------------------------------------------------------|-------------------------------------------------------|
| __年__月__日 | 血沉（ESR）          |                                                                                                        |  | <input type="checkbox"/> 是 <input type="checkbox"/> 否 | <input type="checkbox"/> 是 <input type="checkbox"/> 否 |
| __年__月__日 | C-反应蛋白           |                                                                                                        |  | <input type="checkbox"/> 是 <input type="checkbox"/> 否 | <input type="checkbox"/> 是 <input type="checkbox"/> 否 |
| __年__月__日 | 血常规              | 白细胞                                                                                                    |  | <input type="checkbox"/> 是 <input type="checkbox"/> 否 | <input type="checkbox"/> 是 <input type="checkbox"/> 否 |
|           |                  | 红细胞                                                                                                    |  | <input type="checkbox"/> 是 <input type="checkbox"/> 否 | <input type="checkbox"/> 是 <input type="checkbox"/> 否 |
|           |                  | 血红蛋白                                                                                                   |  | <input type="checkbox"/> 是 <input type="checkbox"/> 否 | <input type="checkbox"/> 是 <input type="checkbox"/> 否 |
|           |                  | 血小板                                                                                                    |  | <input type="checkbox"/> 是 <input type="checkbox"/> 否 | <input type="checkbox"/> 是 <input type="checkbox"/> 否 |
| __年__月__日 | 肝功能              | ALT                                                                                                    |  | <input type="checkbox"/> 是 <input type="checkbox"/> 否 | <input type="checkbox"/> 是 <input type="checkbox"/> 否 |
|           |                  | AST                                                                                                    |  | <input type="checkbox"/> 是 <input type="checkbox"/> 否 | <input type="checkbox"/> 是 <input type="checkbox"/> 否 |
|           |                  | 总胆红素                                                                                                   |  | <input type="checkbox"/> 是 <input type="checkbox"/> 否 | <input type="checkbox"/> 是 <input type="checkbox"/> 否 |
|           |                  | 直接胆红素                                                                                                  |  | <input type="checkbox"/> 是 <input type="checkbox"/> 否 | <input type="checkbox"/> 是 <input type="checkbox"/> 否 |
| __年__月__日 | 肾功能              | 肌酐                                                                                                     |  | <input type="checkbox"/> 是 <input type="checkbox"/> 否 | <input type="checkbox"/> 是 <input type="checkbox"/> 否 |
|           |                  | 尿素氮                                                                                                    |  | <input type="checkbox"/> 是 <input type="checkbox"/> 否 | <input type="checkbox"/> 是 <input type="checkbox"/> 否 |
| __年__月__日 | 骨密度              | 腰椎：BMD：_____ T 值：_____ Z 值：____<br>股骨颈：BMD：_____ T 值：_____ Z 值：____<br>全髋：BMD：_____ T 值：_____ Z 值：____ |  |                                                       |                                                       |
| __年__月__日 | 颈椎 X 线片<br>（正侧位） | 评分：                                                                                                    |  |                                                       |                                                       |
| __年__月__日 | 腰椎 X 线片<br>（正侧位） | 评分：                                                                                                    |  |                                                       |                                                       |
| __年__月__日 | 髋关节 X<br>线片      | 左侧分级：                                                                                                  |  | 右侧分级                                                  |                                                       |
| __年__月__日 | 髋关节 CT           | 左侧分级：                                                                                                  |  | 右侧分级                                                  |                                                       |
| __年__月__日 | 髋关节<br>MRI       | 左侧活动性炎症：                                                                                               |  | 右侧活动性炎症：                                              |                                                       |
| __年__月__日 | 双髋 X 线           | 左侧分级：                                                                                                  |  | 右侧分级：                                                 |                                                       |
| __年__月__日 | 双髋 CT            | 左侧分级：                                                                                                  |  | 右侧分级：                                                 |                                                       |

|                      |                                               |      |
|----------------------|-----------------------------------------------|------|
| 患者姓名拼音字母<br><br>□□□□ | 就诊日期<br> _ _ _ _ / _ _ _ _ <br><br> <br>年 月 日 | 不良事件 |
|----------------------|-----------------------------------------------|------|

检查单粘贴页面
