# Supplementary material for: Interaction effects of significant risk factors on low bone mineral density in ankylosing spondylitis
Source: PeerJ. 2023 Nov 22;11:e16448. doi: 10.7717/peerj.16448 (PMC10676083; doi:10.7717/peerj.16448)
Supplement: Supplemental Information 6 [file peerj-11-16448-s006.xlsx]

## Sheet: tranining set 
number	age	height	weight	bmi	gender	sport	lbmd	lt	lz	fnbmd	fnt	fnz	hipt	hipz	hipbmd	alcohol_history	alcohol_duration	alcohol_frequency	dalliy_alcohol	current_tnf_i	current_cdmards	current_nsaids	chest_expansion	modified_schober	asymmetricsacroiliitis	smoking_index	basfi	basmi	family_history	ever_smoking	current_smoking	smoke_duration	cigarettes_per_day	duration_of_symptoms	duration_of_diagnosis	onset_age	hla_b27	esr	crp	night_pain	pga	asdas_crp	basdai	sacroiliitis_average	hipinvolvement	comment_total_msasss
1	20	185	72.5	21.1833	1	0	1.276	1.6	1.3	1.147	1.3	0.9	1.5	1.4	1.183	0	0	0	0	0	0	0	7	6	1	0	1.2	0	0	0	0	0	0	7	5	13	0	1	0.173	3	4	0.32	0.6	2.5	0	0
2	32	178	63	19.8839	1	0	1.01	-0.6	-0.5	0.998	0.2	0.3	-0.2	-0.1	0.971	0	0	0	0	0	0	1	2	4	0	70	2.4	3	0	1	1	10	7	10	5	22	1	30	2.07	2	2	1.24	1.5	3	0	6
3	33	170	58	20.0692	1	0	1.032	-1.2	-0.9	0.816	-0.9	-0.9	-0.8	-0.7	0.76	1	10	1	1	0	0	1	1.5	0.5	0	0	2.2	6	0	0	0	0	0	20	4	13	1	29	2.16	5	5	2.11	4.6	4	1	44
4	34	175	64	20.898	1	1	1.08	0	0.1	0.816	-1.2	-1.1	-0.9	-0.9	0.863	1	14	1	1	0	0	1	5	6	0	200	0.3	0	0	1	1	10	20	7	5	27	1	2	0.342	1	1	0.5	1.1	2	0	0
5	27	162	45	17.1468	1	0	1.115	0	0.2	1.017	0.7	1.1	0.8	1.1	1.077	0	0	0	0	0	0	0	4	8	0	0	3.3	0	0	0	0	0	0	9	9	18	1	23	1.7	2	2	1.17	2	2	0	0
6	24	177	79	25.2163	1	0	0.937	-1.2	-2.1	1.044	0.5	-0.1	0.3	0.2	1.03	0	0	0	0	0	0	1	7	4	0	8	2	3	0	1	1	1	8	7	4	17	1	8	0.1	5	2	1.06	2.4	3	0	0
7	37	175	61	19.9184	1	0	1.046	-0.3	0	0.839	-1.1	-0.7	-1.2	-1.1	0.838	0	0	0	0	0	0	0	3.5	2	2	0	0	3	0	0	0	0	0	20	10	17	1	6	1.41	6	3	1.92	4.6	3	0	3
8	54	160	69	26.9531	0	1	0.935	-1.5	-1.1	0.757	-1.4	-1	-1.7	-1.5	0.751	1	33	1	1	0	0	0	5	5	0	0	1.8	1	0	0	0	0	0	7	3	47	1	25	0.626	2	2	0.74	1.2	2	0	15
9	33	164	50	18.5901	1	0	0.702	-3.2	-2.6	0.667	-2.4	-2	-2	-1.8	0.73	0	0	0	0	0	0	0	7	2.5	0	0	1.6	3	1	0	0	0	0	6	4	27	1	48	2.54	8	8	2.91	4.6	4	0	50
10	26	170	69	23.8754	1	0	0.935	-1.2	-1.5	1.061	0.6	0.4	0.4	0.3	1.046	1	6	1	1	0	0	1	7	7	0	0	0	0	0	0	0	0	0	6	1	20	1	9	0.847	4	2	1.32	2.2	2	0	0
11	25	180	77	23.7654	1	0	1.321	2	1.4	1.064	0.7	0.5	0.4	0.2	1.045	0	0	0	0	0	0	0	2	8	0	120	0	0	0	1	1	10	12	9	9	16	1	3	1.86	4	3	1.55	2.1	3	0	0
12	38	178	96	29.2992	1	0	1.321	2	1.4	1.064	0.7	0.5	0.4	0.2	1.045	1	18	1	1	0	0	1	3.5	5	0	600	2.3	3	0	1	1	15	40	7	1	31	0	2	0.996	5	5	2.04	4.2	3	0	22
13	43	160	60	23.4375	0	0	1.09	-0.2	-0.5	0.529	-2.1	-2.3	0.6	0.6	1.049	0	0	0	0	0	0	1	4	7	0	0	2.6	0	0	0	0	0	0	10	10	33	0	3	0.138	2	2	0.71	2.2	2	0	0
14	31	170	70	24.2215	1	1	1.015	-0.6	-0.6	0.863	-0.9	-0.9	-0.3	-0.3	0.958	0	6	1	2	0	0	1	4	4	0	120	5.1	2	0	1	1	12	10	3	1	28	1	14	0.866	2	3	1.08	2.6	2	0	0
15	20	170	56	19.3772	1	1	0.864	-1.8	-1.7	0.87	-0.8	-1	-1.5	-1.4	0.802	1	4	1	1	0	0	0	4.5	6	0	0	2.4	1	0	0	0	0	0	7	7	13	0	2	0.543	3	4	1.19	1.8	2	1	0
16	34	178	58	18.3058	1	0	1.161	0.7	0.9	0.777	-1.5	-1.3	-1.4	-1.1	0.847	0	0	0	0	0	0	1	3	3	0	360	0.8	3	0	1	1	18	20	11	10	23	1	78	6.91	4	4	2.68	4.9	4	1	3
17	24	169	55	19.257	1	0	0.929	-2.2	-1.7	0.827	-1.5	-1.3	-1.1	-0.9	0.89	0	0	0	0	0	0	1	7	8	0	0	0	0	0	0	0	0	0	3	2	21	1	2	0.173	5	3	1.2	2.5	2	0	0
18	32	170	67	23.1834	1	0	1.284	0.6	0.7	1.042	0.2	0.3	-0.9	-0.9	0.9	0	0	0	0	0	0	1	6	6	1	0	0.2	3	0	0	0	0	0	15	7	17	1	16	0.588	1	1	0.56	0.6	2.5	1	0
19	33	161	50	29.1162	0	1	1.042	-1.1	-0.8	1.069	0.7	1	-0.1	0.1	0.99	1	13	1	1	0	0	1	6	5	1	200	2.5	2	0	1	1	10	20	7	6	26	1	25	0.348	7	7	2.64	6.8	2.5	0	4
20	67	168	85	19.5918	1	0	1.231	1.2	1.5	0.751	-1.7	0.9	-2	-0.7	0.736	0	0	0	0	0	1	1	4	4	0	200	1.5	3	0	1	1	40	5	40	20	27	1	31	1.37	4	4	1.77	3.3	4	1	60
21	44	175	60	19.5918	1	0	0.824	-2.1	-1.4	0.823	-1.2	-0.5	-1.6	-1.4	0.78	0	0	0	0	0	0	1	7	6	0	0	0	0	0	0	0	0	0	10	0	34	1	30	2.13	0	0	1.98	4.2	3
22	27	175	60	24.4148	1	0	1.237	1	1.1	1.033	0.9	0.8	0.4	0.3	1.019	0	0	0	0	0	0	1	3	6	0	0	1.5	2	1	0	0	0	0	10	10	17	1	23	2.22	5	5	2.27	4.5	4	1	0
23	32	173	103	20.83	1	0	0.94	-1.2	-1.9	1.041	0.5	0.1	0.1	-0.1	1.004	0	0	0	0	0	0	1	0	3	0	0	0	5	0	0	0	0	0	10	4	22	1	25	2.89	2	2	1.38	1.5	4	0	36
24	39	158	52	25.9107	0	0	1.009	-0.9	-0.5	0.782	-1.2	-1	-0.8	-0.7	0.77	0	0	0	0	0	0	0	7	6	0	0	1.7	0	0	0	0	0	0	10	9	29	0	10	0.1	3	3	0.75	1.5	2	0	0
25	36	160	76	29.6875	0	0	1.357	2.3	2.2	1.058	0.6	0.7	0	0	0.994	0	0	0	0	0	0	0	3	1	0	0	0	7	1	0	0	0	0	23	13	13	1	1	0.131	5	5	1.58	2.9	4	1	69
26	34	170	70	24.2215	1	0	1.109	0.2	0	0.869	-0.8	-1	-0.5	-0.5	0.931	1	14	1	1	0	0	0	6	8	0	0	0	0	0	0	0	0	0	11	10	23	1	27	1.42	4	4	1.79	4	2	0	0
27	30	180	100	20.8642	1	0	1.733	5.4	4.6	0.924	-0.4	-0.9	-0.2	-0.5	0.961	0	0	0	0	0	0	0	5	5	0	0	1.4	7	0	0	0	0	0	20	13	10	1	19	1.41	4	4	1.84	4.4	4	1	72
28	29	170	70	24.2215	1	0	1.248	1.4	1.3	0.884	-0.7	-0.8	-0.3	-0.3	0.95	0	0	0	0	0	0	0	5	8	0	0	0	0	0	0	0	0	0	12	1	17	1	41	5.06	2	5	2.19	3.7	2	0	2
29	36	153	41	17.5146	1	0	0.976	-1.6	-0.6	0.773	-1.3	-0.6	-1.2	-0.5	0.825	0	0	0	0	0	1	1	7	6	0	0	0	0	0	0	0	0	0	1	1	35	1	82	2.36	3	3	1.55	2.2	2	0	0
30	48	170	86	29.7578	1	0	0.993	-0.7	-0.8	0.872	-0.8	-0.5	-1.2	-1.2	0.839	1	20	1	1	0	1	1	7	6	0	400	1	2	0	1	1	20	20	10	10	38	1	22	2.33	8	8	2.97	6.5	3	1	50
31	46	171	77.5	26.5039	1	0	1.105	0.2	0.2	0.912	-0.5	-0.2	-0.5	-0.5	0.925	0	0	0	0	0	1	1	7	6	0	200	0	0	0	1	1	10	20	19	11	27	1	14	0.118	4	4	1.31	3	2	0	0
32	29	167	62	22.231	1	0	0.794	-2.4	-2.3	0.998	0.2	0.2	-0.6	-0.6	0.908	1	10	1	1	0	0	0	3	7	0	45	2.1	0	0	1	1	9	5	10	0	19	1	11	1.16	7	6	2.51	5.5	4	1	36
33	37	178	70	22.0932	1	0	0.88	-1.7	-1.6	1.053	0.6	0.8	0.2	0.2	1.018	0	0	0	0	0	0	0	3	3	0	0	2.4	3	0	0	0	0	0	4	3	33	1	14	1.08	5	5	1.93	3.6	4	0	8
34	23	181	98	29.9136	1	0	1.154	-0.2	-2.4	0.936	-0.1	-1.3	-0.9	-2.1	0.82	0	0	0	0	0	1	1	3	3	0	0	1.5	4	0	0	0	0	0	7	4	16	1	40	5.5	5	4	2.24	2	3	0	24
35	37	175	107	24.9388	1	0	1.072	-0.9	-1.4	0.893	-0.4	-1	0.2	-0.3	0.97	0	0	0	0	0	0	1	5	3	0	0	0	2	1	0	0	0	0	16	9	21	1	44	12.3	4	5	2.87	3.3	3	1	3
36	22	160	55	21.4844	1	0	0.908	-1.4	-1.3	0.726	-1.9	-2	-2	-1.9	0.736	0	0	0	0	0	0	1	4	6	0	21	0	0	0	1	1	3	7	5	2	17	1	7	1.51	2	2	1.13	1.4	3		0
37	47	162	58	22.1003	1	0	1.045	-0.5	-0.9	0.933	0.3	0.4	0	-0.1	0.929	0	0	0	0	0	0	1	7	6	1	0	2.6	0	0	0	0	0	0	18	6	29	1	10	0.151	1	0	0.67	1.5	2.5	0	8
38	35	185	67	19.5763	0	1	1.14	0.2	-0.3	0.948	0.1	-0.2	-0.3	-0.7	0.895	0	0	0	0	0	0	1	6	6	0	0	0	0	1	0	0	0	0	3	2	32	1	6	0.1	4	4	1.18	3	2		0
39	46	160	59	23.0469	1	0	1.26	1.2	1.6	0.981	0.4	1	0.7	0.5	1.012	0	0	0	0	0	0	0	7	6	-1	0	0	1	0	0	0	0	0	20	12	26	1	34	1.75	7	7	2.99	7.2	3.5	0	6
40	25	175	70	22.8571	1	1	1.145	-0.3	-0.7	1.149	1.5	1.1	1.1	0.7	1.079	0	15	2	1	0	0	0	6	10	0	0	0	0	0	0	0	0	0	12	9	13	1	13	1	1	1	0.84	1.4	3	0	0
41	47	165	90	23.0578	1	0	1.119	0.3	0.1	1.007	0.2	0.4	0.8	0.7	1.091	1	27	1	1	0	0	1	7	6	0	0	0.7	1	0	0	0	0	0	10	1	37	1	16	1.35	4	4	1.48	2.2	3		11
42	26	160	71	27.7344	1	0	1.658	4.8	4.6	0.617	-2.8	-2.9	-1.6	-2.3	0.738	0	0	0	0	0	0	1	0.5	2	0	0	0.6	6	0	0	0	0	0	14	14	12	1	39	4.8	3	2	1.73	1.6	4	1	56
43	21	183	90	26.8745	1	0	1.125	0.5	1.5	0.834	-0.9	1.7	-1.6	-2.3	0.738	0	0	0	0	0	0	1	4	3	0	0	2.3	3	0	0	0	0	0	12	4	9	1	72	6.88	7	6	3.2	4.2	2	1	0
44	31	170	80	27.6817	1	0	0.659	-3.5	-3.3	0.642	-2.6	-2.5	-2.19	-2.8	0.612	0	0	0	0	0	1	1	5	10	-1	30	0.3	0	0	1	1	3	10	6	1	25	1	34	0.1	0	5	1.08	1.2	2.5	1	0
45	32	169	70	24.5089	1	1	1.467	3.2	3.2	1.361	2.9	3	3.2	3.1	1.121	1	14	1	2	0	0	0	4	7	0	0	0.3	0	0	0	0	0	0	9	9	23	1	1	0.251	5	5	1.84	4.05	3	0	0
46	42	178	65	20.5151	1	0	1.147	0.5	0.8	1.053	0.6	0.9	0.7	0.8	1.081	0	0	0	0	0	0	0	5	6	0	0	2.6	0	0	0	0	0	0	14	13	28	1	5	0.401	4	4	1.4	2.9	2	0	0
47	68	165	65	23.8751	1	0	1.873	5.8	6.8	1.183	1.8	3	2.8	3.7	1.303	0	0	0	0	0	0	0	2.5	3	0	0	4	4	0	0	0	0	0	11	6	57	0	3	0.1	4	4	0.61	5.2	3	1	50
48	37	165	75	27.5482	1	0	1.162	0.7	0.6	1.053	0.6	0.7	1.7	1.5	1.158	1	17	1	1	0	0	1	5	5	0	65	0	0	0	1	1	13	5	7	5	30	0	7	1.15	6	6	1.95	3	2	0	2
49	36	165	75	27.5482	1	0	1.175	0.9	-0.7	1.086	1	0.9	1.9	1.7	1.182	1	16	1	1	0	0	1	6	8	0	60	1.7	0	0	1	1	12	5	6	5	30	0	6	0.625	7	8	2.5	5.1	2	0	2
50	30	175	54	17.6327	1	0	1.264	1.5	1.9	1.008	0.2	0.5	-0.3	-0.2	0.951	1	10	1	1	0	0	1	4	8	0	0	2	0	1	0	0	0	0	2	2	28	1	18	1.91	4	4	1.75	2.6	2	0	0
51	44	158	55	22.0317	0	0	1.254	1.4	1.3	1.068	0.7	1	0.9	0.8	1.054	0	0	0	0	0	0	0	6	6	0	0	0.2	0	1	0	0	0	0	5	2	39	1	16	0.267	2	2	0.73	1.3	2	0	9
52	32	173	75	25.0593	1	0	1.326	2	2	1.081	0.8	0.7	0.1	0.1	1.004	0	0	0	0	0	0	1	5	6	0	0	0	0	1	0	0	0	0	7	7	25	1	20	2.37	2	1	1.26	3	2	0	0
53	46	178	85	26.8274	1	0	1	0.5	0.3	0.72	-2	-1.8	-1.6	-1.4	0.762	1	26	1	1	0	0	0	3	3	0	200	5	4	0	1	1	20	10	20	8	26	1	11	0.1	4	3	1.07	2.4	4	0	58
54	33	168	55	19.487	1	0	1.077	-0.9	-0.9	0.834	-0.9	-0.6	-1.1	-0.7	0.8	0	0	0	0	0	0	1	3	3	0	0	0	1	1	0	0	0	0	21	15	12	1	8	0.1	7	7	0.61	4.4	4	1	30
55	36	163	69	25.9701	1	1	0.883	-1.5	-2.5	0.755	-1.5	-1.5	-1.5	-1.5	0.75	1	6	1	3	0	0	0	3	2	0	18	1.4	7	0	1	1	6	3	12	5	24	1	47	5.01	2	2	1.98	2.5	4	1	51
56	23	175	60	19.5918	1	1	0.974	-1.7	-1.5	1.124	1.3	1.1	1.8	1.6	1.176	0	0	0	0	0	0	1	3	3	0	0	2.5	4	0	0	0	0	0	6	5	17	1	17	1.91	5	5	2.39	4.1	4	0	6
57	23	170	57	19.7232	1	1	0.713	-3.9	-3	0.521	-3.3	-3.3	-3.6	-3.5	0.479	0	8	1	2	0	1	1	4	4	0	0	7.8	3	0	0	0	0	0	14	11	9	1	30	1.57	5	6	2.23	3.8	4	1	0
58	29	176	90	29.0548	1	0	1.257	1.5	0.9	0.982	0	-0.4	0.6	0.4	1.067	0	0	0	0	0	0	1	4	6	0	40	0.5	0	1	1	1	4	10	4	3	25	1	62	2.39	5	4	2.1	3.4	3	1	2
59	33	165	65	23.8751	0	0	1.145	0.3	-0.6	0.949	0.4	0.1	-0.3	-0.7	0.895	0	0	0	0	0	0	0	5	5	0	0	0	0	1	0	0	0	0	2	1	31	1	12	0.101	2	2	0.72	1.9	2	0	0
60	33	165	65	23.8751	0	0	0.841	-2	-1.4	0.718	-2	-1.4	-1.9	1.3	0.783	0	0	0	0	0	0	0	5	3	0	0	0	1	1	0	0	0	0	2	1	31	1	12	0.101	3	2	0.92	1.9	4		2
61	26	170	58	20.0692	1	0	0.949	-1.9	-1.2	1.019	0.5	0.5	0.7	0.7	1.03	0	0	0	0	0	0	1	4	4	0	0	1.1	3	0	0	0	0	0	10	10	16	1	16	1.17	2	2	0.51	1.9	3	1	0
62	25	175	67	21.8776	1	0	1.153	0.6	0.5	0.962	-0.1	-0.3	-0.2	-0.2	0.969	0	0	0	0	0	0	0	5	7	0	0	2.9	0	0	0	0	0	0	4	2	21	1	2	1.78	3	0	1.26	1.1	2	0	1
63	31	165	65	23.8751	1	1	1.021	-1.3	-1.4	0.875	-0.6	-0.5	-0.9	-0.9	0.817	1	10	2	1	0	0	0	3	5	0	0	0.6	4	0	0	0	0	0	15	13	16	1	14	0.362	2	2	0.57	3.7	4	1	26
64	42	175	75	24.4898	1	0	1.217	0.3	0.3	0.9	0.4	0.4	-0.2	-0.1	0.91	1	22	1	1	0	0	0	6	5	0	200	0	0	1	1	1	20	10	7	3	35	1	21	1.67	4	3	1.56	2.4	3	0	12
65	37	170	60	20.7612	1	0	1.053	-1.1	-1.1	0.988	0.3	-0.3	0.4	0.5	0.989	0	0	0	0	0	0	1	6	8	0	20	0	0	0	1	1	2	10	13	12	24	1	46	1.68	3	2	1.43	2.5	4	0	6
66	30	175	75	24.4898	1	0	1.008	-1.6	-1.8	0.94	-0.6	-0.7	0.1	-0.3	0.951	0	0	0	0	0	0	0	7	6	0	0	0.4	0	1	0	0	0	0	4	2	26	1	8	0.493	3	3	1.36	3.3	3		0
67	30	176	75	24.2123	1	0	0.977	-0.9	-1.7	0.941	-0.1	-0.4	-0.5	-0.6	0.965	0	0	0	0	0	0	1	6	6	0	6	1.5	0	1	1	1	2	3	5	4	25	1	9	0.545	2	4	1.11	2.4	4	0	0
68	37	170	65	22.4914	1	0	1.378	2.5	2.7	0.97	-0.1	0.2	0.4	0.4	1.042	0	0	0	0	0	0	0	6	6	0	0	1	1	1	0	0	0	0	2	2	35	1	19	0.805	2	3	1.58	3.7	2		0
69	24	156	49	20.1348	0	0	1.123	-0.5	-0.5	0.83	-0.9	-0.9	-1.9	-2.8	0.634	0	0	0	0	0	0	1	1.5	5	0	0	3	0	1	0	0	0	0	11	9	13	1	12	1.25	4	4	1.67	2.8	4	0	0
70	39	172	85	28.7317	1	0	1.3	1	-0.3	0.972	0.2	0.2	1	0.8	1.069	1	19	1	1	0	0	0	7	6	0	400	0	1	1	1	1	20	20	3	2	36	1	9	1.28	4	4	1.58	3	3	0	0
71	23	180	55	16.9753	1	0	1.092	-0.7	-0.1	0.816	-0.9	-1	-1.3	-1.3	0.767	0	0	0	0	1	0	1	4	5	0	0	3.5	1	0	0	0	0	0	10	7	13	1	60	2.63	6	6	2.47	4	4	1	0
72	29	177	57	18.194	1	0	0.907	-2.3	-1.9	0.813	-1.1	1	-0.8	-0.7	0.84	0	0	0	0	0	0	0	1	3	0	0	1.9	4	0	0	0	0	0	5	3	24	1	12	0.68	2	4	1.3	2.6	4	0	48
73	34	160	52	20.3125	0	1	1.172	0.5	0.6	0.823	-0.6	-0.5	0.5	0.6	0.171	0	0	0	0	0	0	1	6	6	-1	0	0	0	0	0	0	0	0	21	19	13	1	55	2.13	5	5	2.09	3.3	3.5	1	0
74	43	164	63	23.4236	0	1	0.874	-2.5	-2.2	0.735	-1.7	-1.8	-1.6	-1.7	0.736	0	0	0	0	0	0	1	6	6	0	0	0	0	1	0	0	0	0	20	1	23	1	22	0.606	3	3	1.17	2	3	1	1
75	65	175	75	24.4898	1	0	1.987	6.7	6.9	0.829	-0.9	0	0.7	0.3	1.036	0	0	0	0	0	0	0	2	4	0	0	0.5	4	0	0	0	0	0	23	6	42	1	24	1.22	3	2	1.37	2.9	4	1	64
76	49	173	62	20.7157	1	1	1.154	-0.2	0.2	0.775	-1.3	-0.6	-0.9	-0.3	0.822	0	0	0	0	0	0	1	2	2	0	750	1.1	3	0	1	1	25	30	12	10	37	1	33	1.49	3	2	1.36	2.3	4	0	30
77	30	177	78	24.8971	1	0	1.102	-0.6	-0.2	0.937	-0.1	0.6	-0.6	-0.1	0.861	0	0	0	0	0	0	1	4	1	0	100	1.6	6	0	1	1	10	10	6	4	24	1	25	2.22	5	5	2.17	3	4	1	31
78	25	173	58	19.3792	1	0	1.107	-0.6	-0.3	0.877	-0.6	-0.6	-0.4	-0.4	0.894	0	0	0	0	0	0	0	4	6	0	0	0	5	0	0	0	0	0	10	8	15	1	16	2.15	2	6	1.64	2.3	4	1	20
79	21	173	63	21.0498	1	1	1.007	-1.4	-1.6	0.898	-0.4	-0.8	-0.3	-0.7	0.897	0	0	0	0	0	0	1	3	3	0	0	1.2	2	0	0	0	0	0	14	6	7	1	42	1.11	3	3	1.85	3.6	3	0	0
80	36	179	70	21.847	1	0	1.154	0	0.4	0.775	-1.3	-0.6	0.1	0.1	0.965	1	20	1	1	0	1	1	3	6	0	0	0	0	0	0	0	0	0	16	8	20	1	49	6.67	6	5	2.86	4.2	2	0	0
81	19	183	69	20.6038	1	0	1.236	0.5	0.1	1.402	3.5	3	2	1.6	1.201	0	0	0	0	0	0	0	2	5	0	0	1.2	0	0	0	0	0	0	5	5	14	0	6	0.355	4	2	1.18	2.8	2	0	0
82	32	176	60	19.3698	1	0	0.948	-1.9	-1.8	0.874	-0.6	-0.4	0.2	0.4	0.969	0	0	0	0	0	0	0	1	1	0	0	3.6	6	0	0	0	0	0	5	5	27	1	22	1.12	5	5	1.72	3	4	0	36
83	23	160	60	23.4375	1	0	1.008	-1.4	1.3	0.736	-1.6	-1.8	-1.9	-2	0.696	0	0	0	0	0	1	0	1	4	0	0	4.5	5	0	0	0	0	0	14	10	9	1	39	4.01	8	7	3.37	5.7	4	1	2
84	32	165	80	29.3848	1	0	0.987	-1.6	-2.6	0.931	-0.1	-0.4	0.5	0.2	1.007	0	0	0	0	0	0	0	4	5	0	0	0.5	2	0	0	0	0	0	6	5	26	1	13	1.28	8	6	2.56	4.7	3	0	14
85	54	160	58	22.6563	0	1	0.911	-1.7	-1.2	0.822	-0.6	0	-0.1	0.3	0.923	0	0	0	0	0	0	0	3	4	0	0	0.4	4	0	0	0	0	0	12	10	42	0	24	1.58	4	3	1.71	2.7	3	0	17
86	35	178	83	26.1962	1	0	1.355	1.5	0.3	1.069	0.9	0.6	1.1	0.8	1.083	0	0	0	0	0	0	0	3	8	0	0	0.2	1	1	0	0	0	0	12	10	23	1	11	1.03	6	6	2.12	3.9	2	0	1
87	46	175	73	23.8367	1	0	0.992	-1.6	-1.9	0.811	-1.1	-0.7	-1.1	-0.8	0.796	0	0	0	0	0	0	0	4	8	0	0	0	1	0	0	0	0	0	7	5	39	1	8	0.889	7	6	2.34	4.2	3	0	0
88	47	178	81	25.565	1	0	1	-0.3	-1	0.892	-0.4	-0.2	-0.2	0	0.921	1	25	2	1	0	1	0	2	4	-1	0	0	3	0	0	0	0	0	20	6	27	1	22	1.46	4	3	1.47	2.2	3.5	0	32
89	31	166	72	26.1286	1	0	0.787	-2.5	-2.5	0.879	-0.8	-0.7	-0.8	-0.8	0.882	0	0	0	0	0	0	0	2	7	0	0	0	0	0	0	0	0	0	20	14	11	1	49	0.515	0	0	1.21	2.1	3	0	4
90	30	160	56.5	22.0703	0	0	1.547	3.6	3.6	1.084	1.3	1.3	1.6	1.6	1.18	0	0	0	0	0	0	0	7	6	0	0	0.1	0	0	0	0	0	0	4	4	26	1	5	0.144	1	1	0.38	1.4	2	0	0
91	37	168	64	22.6757	1	1	1.186	0.9	1.1	1.038	0.5	0.7	0.2	0.3	1.023	0	0	0	0	0	0	0	2	3	0	200	1.8	7	0	1	1	20	10	5	1	32	1	19	1.13	2	0	1.07	2.1	4		64
92	22	178	60	18.937	1	0	0.956	-1.1	-1.1	0.781	-1.5	-1.5	-1.7	-1.7	0.776	0	0	0	0	0	0	1	4	8	0	0	0	3	1	0	0	0	0	10	8	12	1	23	1.46	5	5	2.1	4	3	0	20
93	62	168	78	27.6361	1	0	1.453	3.1	3.7	0.82	-1.2	-0.3	-1.8	-1.5	0.756	0	0	0	0	0	0	0	1	2.5	0	0	4.8	5	0	0	0	0	0	8	7	54	0	6	0.283	3	3	1.07	2.6	3	0	54
94	31	168	68	24.093	1	0	1.017	-0.5	-0.6	0.608	-2.8	-2.9	-2.4	-2.4	0.679	0	0	0	0	0	0	1	1	2	0	0	1.8	5	0	0	0	0	0	18	18	13	1	8	0.904	3	5	1.78	3.6	4	1	54
95	27	175	70	22.8571	1	0	1.014	-0.6	-0.7	1.089	0.9	0.7	2	2	1.257	0	0	0	0	0	1	1	2	3	0	0	4.2	3	1	0	0	0	0	15	12	12	1	22	2.72	8	7	2.85	4.6	4	0	7
96	47	160	70	27.3438	0	0	0.872	2	2	0.998	0.8	0.6	0.2	-0.2	0.958	0	0	0	0	0	0	0	4	4	0	0	1.4	1	0	0	0	0	0	8	6	39	1	12	0.1	2	2	1.44	3.3	2	0	7
97	25	172	51	17.239	1	0	1.026	-0.5	-0.2	0.957	-0.2	-0.1	-0.6	-0.5	0.913	0	0	0	0	0	0	1	4	6	0	0	1.5	3	0	0	0	0	0	10	8	15	1	14	3.84	3	3	2.12	3.6	4	1	2
98	51	170	72	24.9135	1	0	1.108	0.2	1.2	0.844	-0.9	0.9	-0.8	0.8	0.89	1	31	1	1	0	0	1	4	4	0	600	2.9	3	0	1	1	30	20	30	2	21	1	11	1.23	3	3	1.46	3	3	0	16
99	20	175	60	19.5918	1	0	1.312	1.7	1.4	0.888	-0.4	-0.4	0.2	0.5	0.956	0	0	0	0	0	1	1	7	4	0	0	0.4	1	0	0	0	0	0	2	2	18	1	25	2.27	2	3	1.46	2.2	4	1	7
100	23	165	55	20.202	0	0	1.065	-0.4	-0.2	1.006	0.6	0.8	0.9	0.7	1.039	0	0	0	0	0	0	1	5	6	0	0	0.8	0	1	0	0	0	0	3	2	20	1	11	0.152	5	3	1.29	2.4	2	0	8
101	52	173	69	23.0546	1	0	1.065	0.7	1.3	0.777	-0.4	-0.1	0.7	0.9	1.082	0	0	0	0	0	0	1	4	3	-1	200	0	1	1	1	1	20	10	4	1	48	1	18	0.525	2	2	0.74	1.3	2.5	0	31
102	22	160	55	21.4844	1	0	1.212	1.1	1.2	1.047	0.5	0.5	1.3	1.2	1.214	0	0	0	0	0	0	1	4	5	0	21	0	0	0	1	1	3	7	5	2	17	1	7	1.51	4	4	1.59	2.4	4	1	0
103	43	160	57	22.2656	0	1	1.296	1.5	1.5	1.169	2.2	2.3	2	1.9	1.169	0	0	0	0	0	0	1	4	7	0	0	0.6	0	0	0	0	0	0	13	11	30	0	2	0.1	3	3	0.83	2.4	2	0	4
104	42	165	66	24.2424	0	0	1.049	-0.5	-0.8	1.034	0.3	1	0.5	0	1.056	0	0	0	0	0	0	0	2	6	0	0	3.6	0	0	0	0	0	0	10	1	32	0	7	0.63	3	0	0.95	1.7	2	0	0
105	38	170	72	24.9135	1	0	1.289	1.7	1.8	0.719	-2	-1.8	-1.7	-1.7	0.766	0	0	0	0	0	0	0	1	5	0	150	1.7	4	1	1	1	15	10	20	16	18	1	7	0.784	4	2	1.1	1.7	4		67
106	28	174	73	24.1115	1	0	1.045	-0.6	-1.4	1.043	0.9	0.3	0.9	0.3	1.088	0	0	0	0	0	0	0	2	4	0	0	0.8	1	0	0	0	0	0	5	1	23	1	4	0.305	3	3	1.05	2.1	2		0
107	48	150	60	26.6667	0	0	1.506	3.3	3.7	0.768	-1.3	-0.8	-0.7	-0.4	0.887	0	0	0	0	0	0	0	2	7	0	0	0	3	0	0	0	0	0	10	1	38	1	75	2.91	2	7	2.12	3.3	4	1	48
108	60	170	75	25.9516	1	0	1.201	1	1.4	0.941	-0.3	0.5	0.3	0.6	1.029	0	0	0	0	0	1	1	7	6	0	0	0.2	0	0	0	0	0	0	8	7	52	1	89	3.24	3	3	1.73	2	2	0	38
109	32	173	75	25.0593	1	0	1.034	-0.4	-0.4	0.966	-0.1	-0.3	-0.4	-0.4	0.936	0	0	0	0	0	0	0	6	6	0	0	2.8	0	1	0	0	0	0	7	7	25	1	20	2.37	5	4	2.16	3	2	0	1
110	40	166	50	18.1449	0	0	1.261	1.2	2.3	1.026	0.8	1.8	1.3	2.2	1.263	0	0	0	0	0	0	1	3	2	0	0	3.3	6	0	0	0	0	0	26	15	14	1	34	0.1	3	3	0.44	2.6	4	1	27
111	22	170	49	16.955	1	0	1.09	-0.2	-0.3	1.117	1.6	1.9	1.3	1.7	1.15	0	0	0	0	0	0	0	5	8	0	0	0	0	0	0	0	0	0	8	7	14	0	3	0.909	5	5	1.34	3.5	2	1	0
112	36	160	61	23.8281	0	0	1.08	-0.3	-0.5	1.036	0.9	0.8	0	-0.1	0.977	0	0	0	0	0	0	0	6	6	0	0	0	0	0	0	0	0	0	13	9	23	1	18	0.698	2	3	0.98	1.6	2	0	6
113	51	170	80	27.6817	0	1	1.064	-0.1	0	0.947	-0.2	0.2	1.1	1.2	1.135	0	20	1	1	0	0	1	7	2	0	0	0	1	0	0	0	0	0	4	3	47	1	43	0.1	2	2	1.63	3	3	0	38
114	33	170	80	27.6817	1	0	0.899	-1.5	-1.8	0.863	-0.9	-1	0.6	-0.7	0.915	1	13	1	1	0	0	1	1	4	0	24	1.6	1	0	1	0	8	3	9	8	24	1	44	2.96	4	4	2	2.8	2	0	4
115	28	160	48	18.75	0	0	1.131	0.1	0.7	0.902	-0.2	0.2	0.2	0.6	1.003	0	0	0	0	0	1	1	7	6	-1	0	0	0	0	0	0	0	0	14	10	14	1	5	1.85	2	2	1.27	3.9	2.5	0	0
116	41	168	53	18.7783	1	0	0.975	-0.9	-1.2	0.85	-0.9	-1.1	-1.7	-2	0.866	0	0	0	0	0	0	1	7	6	0	400	2.3	4	1	1	1	20	20	21	19	20	0	5	0.497	3	4	1.37	3.6	3		6
117	29	155	50	20.8117	0	0	0.872	-2	-1.5	0.567	-3	-2.7	-2.6	-2.3	0.632	0	20	1	2	0	0	0	4	6	0	0	5.5	2	0	0	0	0	0	5	5	24	1	0	1.5	2	4	1.71	3.2	4	1	0
118	40	167	78	27.968	1	0	1.038	-0.4	-0.4	0.8	-1.4	-1.2	-0.9	-1	0.869	1	20	1	1	0	0	0	7	6	0	35	0	1	0	1	1	7	5	15	9	25	1	2	0.1	1	1	0.72	2.2	4	1	32
119	36	165	60	22.0386	1	0	0.631	-4.6	-4.5	0.72	-2.8	-2.6	-1.8	-1.6	0.704	0	0	0	0	0	0	1	3	3	0	0	1.4	5	0	0	0	0	0	20	12	16	1	38	3.4	3	4	2.21	3.5	4	1	64
120	27	170	75	25.9516	1	0	0.958	-0.9	-1.3	1.006	0.2	0	0.1	-0.3	0.951	0	5	1	2	0	1	1	2.5	0.5	0	50	1.6	3	0	1	1	10	5	11	10	16	1	21	3.09	6	6	2.61	3.7	4	1	2
121	60	160	65	25.3906	0	0	0.879	-1.9	-1.6	0.775	-0.9	0	-1.5	-0.8	0.757	0	0	0	0	0	1	0	1	2.5	-1	0	6.8	3	0	0	0	0	0	6	6	54	1	75	2.71	5	2	1.92	2.9	2.5	0	33
122	27	174	120	29.6354	1	0	0.937	-1.2	-2.1	1.044	0.5	-0.1	0.9	0.6	1.104	0	0	0	0	0	0	0	6	7	0	140	1.4	1	0	1	1	7	20	10	1	17	1	30	2.39	4	3	1.87	3	3	0	10
123	27	178	78	24.6181	1	0	1.077	0	-0.4	0.918	-0.5	-0.7	0.2	-0.1	0.966	0	0	0	0	0	0	0	7	6	0	0	0	1	0	0	0	0	0	2	2	25	1	7	0.579	6	4	1.63	3.4	2	1	0
124	21	178	65	20.5151	1	0	1.147	0.5	0	0.988	-0.4	-0.4	0.2	0.1	1.021	0	0	0	0	0	1	1	6	7	0	0	1.2	1	0	0	0	0	0	2	1	19	1	53	1.83	2	2	1.4	3.2	2	1	0
125	26	160	55	21.4844	0	0	1.209	0.8	1	0.882	-0.4	-0.3	-0.1	0	0.959	1	20	1	1	0	0	0	7	6	0	0	3.8	0	0	0	0	0	0	1	1	25	0	7	0.471	5	5	1.41	5	2		0
126	41	160	65	25.3906	1	0	1.042	-0.3	0	0.971	-0.1	0.3	0.6	0.7	1.065	0	0	0	0	0	0	0	6	6	-1	0	0	1	1	0	0	0	0	10	9	31	1	11	0.614	3	5	1.51	2.7	3.5	0	44
127	32	175	78	25.4694	1	0	1.152	0.6	0.4	1.03	0.4	0.3	1.3	0.8	1.104	1	12	1	1	0	0	0	6	7	0	35	0	0	0	1	0	7	5	9	6	23	1	16	0.693	3	5	1.8	3.5	2	0	1
128	43	160	68	26.5625	1	0	1.427	2.9	3.1	0.948	-0.2	0.2	-0.1	0	0.977	0	0	0	0	0	0	0	2	3	0		5.8	3	0	1	1		20	11	10	32	1	10	0.833	2	4	1.24	2.1	4	0	34
129	41	178	78	24.6181	1	0	0.961	-0.1	-0.8	0.823	-1.2	-0.9	-0.7	-0.6	0.906	1	21	1	1	0	0	0	1	3	0	600	0.4	1	0	1	1	30	20	7	6	34	1	86	11	4	4	2.57	3.2	2	0	3
130	31	177	69	22.0243	1	0	1.093	0.1	0.1	0.901	-0.6	-0.6	-0.2	-0.2	0.961	0	0	0	0	0	0	0	4	8	0	0	1.1	2	0	0	0	0	0	17	10	14	1	2	0.1	1	1	0.42	0.9	2	0	0
131	28	155	52	21.6441	1	1	1.165	0.7	1	1.038	0.5	0.6	-0.5	-0.4	0.924	1	3	1	1	0	0	0	2	4	0	160	3.3	4	0	1	1	8	20	9	9	19	1	18	2.77	3	2	1.7	2.8	3	1	0
132	31	160	52	20.3125	0	0	0.938	-1.5	-1.1	0.732	-1.6	-1.4	-2	-1.8	0.713	0	0	0	0	0	0	0	6	8	1	0	0.2	0	0	0	0	0	0	6	3	25	1	48	1.08	5	5	1.93	3.9	3.5	0	2
133	63	167	50	17.9282	1	0	1.063	-0.6	0.9	0.827	-1.2	0.1	-0.1	0.4	0.972	0	0	0	0	0	0	0	2	4	0	0	0.3	1	0	0	0	0	0	13	2	50	1	14	0.339	3	2	0.78	1.4	2	0	0
134	54	170	60	20.7612	1	0	1.463	2	3.3	1.226	1.9	2.8	1	1.3	1.37	0	0	0	0	0	0	1	1.5	0.5	0	0	5.1	8	0	0	0	0	0	30	30	24	1	10	0.598	4	2	1.15	2.1	4	1	72
135	21	172	58	19.6052	1	0	1.066	-1.1	-0.7	1.192	1.3	1.3	1.2	1.2	1.191	0	0	0	0	0	1	1	6	7	0	0	0	0	1	0	0	0	0	5	4	16	1	46	10.8	6	4	2.97	3.8	2	0	0
136	24	169	56	19.6072	1	0	1.193	-0.1	0.4	0.969	-0.4	-0.3	-0.5	-0.4	0.966	0	0	0	0	0	0	0	2.5	6	0	0	0.7	3	0	0	0	0	0	10	1	14	1	37	4.04	3	4	2.1	2.6	4	1	0
137	26	172	55	18.5911	1	0	1.377	1.4	1.9	0.849	-1.3	-1.1	-0.6	-0.4	0.952	0	0	0	0	0	0	0	4	3	0		0.2	5	0	1	1		5	7	7	19	1	13	1.69	3	4	1.51	2.8	4	1	18
138	29	181	55	16.7883	1	1	1.137	-0.6	-1.4	1.092	0.6	0	0.5	-0.1	1.101	1	9	1	1	0	0	1	4	8	0	80	0	0	0	1	1	4	20	0.2	0	29	1	40	0.412	3	3	1.24	2.9	2	0	0
139	47	153	79	23.7477	1	1	1.141	-0.5	-0.7	0.788	-1.8	-1.3	-1.8	-1.5	0.799	0	0	0	0	0	0	0	0.5	2	0	600	3	6	1	1	1	30	20	20	10	27	1	5	0.631	1	1	0.59	0.8	4	0	66
140	48	165	69	25.3444	0	0	1.318	1.2	1.5	1.026	0.4	0.8	1.3	1.7	1.16	0	0	0	0	0	0	1	6	6	0	0	0	0	0	0	0	0	0	20	4	28	1	39	0.1	4	2	1.63	1.5	3	1
141	45	170	72	24.9135	1	0	1.055	-0.2	0	0.87	-0.8	-0.4	-0.1	0	0.982	0	0	0	0	0	0	0	7	6	0	0	3.5	0	0	0	0	0	0	15	0	30	1	7	0.935	0	0	1.27	1.8	2		0
142	26	178	80	25.2493	1	0	1.225	1.2	0.7	1.005	0.2	-0.1	0.8	0.6	1.091	0	0	0	0	0	0	1	7	6	0	0	1.9	0	0	0	0	0	0	7	7	19	1	4	0.647	3	2	0.35	2.3	4	0
143	30	156	57	23.4221	0	0	1.257	1.2	1.3	1.158	1.9	1.9	2	2	1.233	0	0	0	0	0	0	1	3	8	0	0	4	0	0	0	0	0	0	4	1	26	1	7	6	3	2	1.83	2.4	2	0	0
144	27	175	81	26.449	1	0	1.002	-0.7	-1	0.905	-0.6	-0.8	-0.1	-0.2	0.975	1	10	1	1	0	0	1	7	8	0	200	1.4	0	0	1	1	10	20	7	0	20	1	7	0.65	3	3	1.29	2.8	2	0	0
145	31	180	78	24.0741	0	0	1.032	-1.2	-1.7	0.918	-0.2	-0.5	0.1	-0.2	0.955	0	0	0	0	0	0	0	7	4	0	0	1.8	3	0	0	0	0	0	14	0	17	0	18	1.16	3	3	1.42	2.7	2		24
146	44	160	57	22.2656	0	1	1.13	0.2	0.2	0.805	-0.8	-0.7	-0.3	-0.4	0.898	0	0	0	0	0	1	1	3	4	0	0	0	1	1	0	0	0	0	8	8	36	1	71	1.33	4	4	1.62	2.9	3	0	4
147	19	165	66	24.2424	1	0	1.318	1.7	1.2	0.904	-0.2	-0.5	0.6	0.3	1.051	0	0	0	0	0	0	0	5	6	0	0	0.6	0	0	0	0	0	0	7	6	12	1	8	1.32	2	4	1.39	2.4	3	1
148	54	180	64	19.7531	0	1	1.516	3.4	1.7	1.13	1.9	1.6	2.5	1.9	1.23	0	0	0	0	0	0	1	3	6	0	0	0.8	0	1	0	0	0	0	15	12	39	1	14	1.03	0	7	1.75	3.4	2	0	2
149	24	178	62.5	19.726	1	0	1.117	0.3	0.3	0.88	-0.8	-0.9	-0.9	-0.9	0.873	0	0	0	0	0	0	1	3	6	0	0	0	1	0	0	0	0	0	7	6	17	1	4	1.32	0	9	1.26	4	3	0	0
150	50	172	89	29.0838	1	0	1.001	-0.9	-0.9	0.789	-1.2	-1	-0.9	-0.9	0.839	1	30	1	1	0	0	0	4.5	6	0	96	0.4	3	0	1	1	8	12	10	6	40	1	8	0.282	3	2	0.93	1.6	2		0
151	29	150	52	23.1111	0	1	1.253	0.5	0.5	0.917	-0.9	-0.7	1.7	1.6	1.139	0	0	0	0	0	1	1	7	6	0	0	1.2	1	1	0	0	0	0	5	4	24	1	51	5.28	4	4	2.34	3.3	2	1	0
152	17	162	62	23.6244	1	1	1.033	-0.4	-0.7	0.788	-1.5	-1.8	-0.7	-0.8	0.898	0	0	0	0	0	1	1	7	6	0	0	7	1	0	0	0	0	0	2	0	15	1	7	1.63	3	5	1.75	2.9	4	1	0
153	43	160	60	23.4375	0	0	1.195	0.7	0.6	0.925	0	0.1	-0.4	-0.3	0.927	0	0	0	0	1	1	1	5	3	0	0	0.4	1	0	0	0	0	0	4	0	39	0	86	0.171	5	1	1.04	2.9	2	0	0
154	31	178	75	23.6713	1	0	1.335	2.1	1.9	1.143	1.3	1.2	1.1	1	1.134	0	0	0	0	0	0	1	6	6	0	0	2.2	4	0	0	0	0	0	19	2	12	0	16	0.621	1	6	1.13	2	4	1	36
155	37	176	51	16.4644	1	0	1.046	-1.1	-0.5	1.13	1.4	1.8	1.1	1.4	1.081	0	0	0	0	0	0	0	2.5	7.5	0	0	4.6	4	0	0	0	0	0	22	8	15	1	9	0.79	3	2	1.65	3.9	4	1
156	36	173	53	17.7086	1	0	0.908	-1.4	-1	0.597	-2.9	-2.5	-1.9	-1.9	0.688	0	0	0	0	0	0	1	1	0.5	0	0	4.3	7	1	0	0	0	0	16	7	20	0	36	1.81	3	3	1.83	3.1	4	1	62
157	25	174	55	18.1662	1	0	0.899	-1.5	-1.4	0.865	-0.9	-0.8	-1.5	-1.4	0.921	0	0	0	0	0	1	1	6	5	0	0	2.5	0	0	0	0	0	0	5	2	20	0	63	0.1	5	5	0.42	4.7	2	0	2
158	19	170	57	19.7232	1	0	0.937	-1.2	-1.2	0.851	-0.9	-1.1	-1.7	-1.7	0.768	0	0	0	0	0	0	0	7	6	0	60	0	0	0	1	1	3	20	7	6	12	1	6	0.836	3	3	1.29	2.4	3		0
159	48	175	80	26.1224	1	0	1.265	1.5	1.5	0.904	-0.6	-0.2	0.2	0.2	0.972	0	0	0	0	0	0	1	5	4	0	0	4.5	1	0	0	0	0	0	20	18	28	1	6	0.815	5	4	1.92	3.6	2	0
160	32	170	54	18.6851	1	0	0.832	-2.1	-1.9	0.521	-3.5	-3.3	-2.1	-1.9	0.666	0	0	0	0	0	1	1	3	2	0	300	2.4	4	0	1	1	15	20	8	8	24	1	52	0.163	3	2	1.47	1.6	4	1	64
161	34	176	75	24.2123	1	0	0.884	-2.5	-3.2	1.041	0.7	0.5	0.8	0.6	1.044	0	0	0	0	0	0	0	3	5	0	0	1.6	4	0	0	0	0	0	15	14	19	1	8	0.634	4	3	1.06	2.4	4		35
162	42	170	75	25.9516	1	0	1.3	1	1	0.91	-0.3	-0.7	0.7	0.3	1.028	1	22	0	0	0	0	1	2	9	-1	0	3.2	0	0	0	0	0	0	34	9	8	1	2	0.229	5	3	1.38	3	3.5	0	8
163	23	158	50	20.0288	1	0	1.195	-0.1	0.5	0.833	-1.4	-1.2	-1.9	-1.8	0.694	0	0	0	0	0	0	1	3	6	0	0	2.3	4	0	0	0	0	0	4	4	19	1	30	2.71	2	4	1.72	2.1	3	1	0
164	32	169	73	25.5593	1	0	1.364	1.4	1.4	1.253	2.3	2.2	2.9	2.8	1.322	0	0	0	0	0	0	0	6	7	0	0	0.3	0	0	0	0	0	0	10	9	22	1	70	11.9	9	9	3.62	4.5	3	0	0
165	21	178	76	23.9869	1	1	1.134	-0.6	-0.6	1.045	0.2	0	0.2	0	1.059	1	6	1	4	0	0	0	6	4	0	35	1.4	1	0	1	1	7	5	3	2	18	1	16	0.324	3	3	1.09	2.2	2	0	0
166	39	170	66	22.8374	1	0	1.424	2.8	2.9	0.936	-0.3	-0.2	0.4	0.4	1.042	0	0	0	0	0	0	0	1	3	0	0	0.4	1	1	0	0	0	0	3	3	36	1	3	6.88	7	7	3.16	4.6	3	0	0
167	25	170	53	18.3391	1	0	1.088	0.1	0.3	0.8	-1.4	-1.3	-1.6	-1.5	0.782	0	0	0	0	0	0	1	0	3	0	100	2	4	0	1	1	10	10	3	1	22	1	23	1.44	6	5	2.35	4.3	4	0	4
168	21	178	78	24.6181	1	1	1.308	1.9	1.5	0.994	0.1	-0.3	-0.5	-0.6	0.93	0	0	0	0	0	1	0	5	6	0	0	1.7	1	0	0	0	0	0	15	8	6	1	28	1.92	6	4	2.11	4.4	2	1	0
169	20	177	75	23.9395	1	0	1.117	0.3	0.3	1.063	0.7	0.5	0.9	0.9	1.105	0	0	0	0	0	0	0	5	5	0	0	2.5	1	0	0	0	0	0	5	4	15	1	36	0.511	7	6	1.32	5.9	2		0
170	28	177	80	25.5354	1	0	0.944	-1.1	-1	0.816	-1.2	-1.2	-0.9	-0.9	0.867	0	0	0	0	0	0	1	6	5	0	100	0.8	1	0	1	1	10	10	5	1	23	1	10	0.485	6	6	2.22	5.2	4	1
171	35	183	75	22.3954	1	0	1.402	2.7	2.6	0.805	-1.3	-1.3	-0.9	-1	0.871	1	20	1	1	1	1	1	4.5	4.5	0	0	0	1	0	0	0	0	0	17	17	18	1	16	1.4	2	2	1.1	1.3	4	1	26
172	19	163	75	28.2284	1	1	0.97	-0.9	-1.3	0.996	0.1	-0.3	0.4	0.2	1.037	0	0	0	0	0	0	1	4	5	0	0	0.3	1	0	0	0	0	0	7	0	12	1	6	0.836	4	4	1.55	2.8	2		0
173	26	170	63	21.7993	1	1	1.227	1.2	1.3	0.894	-0.6	-0.6	1	0.9	1.077	1	5	1	1	0	0	1	1	2.5	0	0	0	3	0	0	0	0	0	10	7	16	1	1	0.371	1	1	0.52	1.3	4	0	62
174	20	170	58	20.0692	1	0	1.068	-0.1	0	0.709	-2.1	-2.1	-3.6	-3.5	0.479	0	0	0	0	0	1	1	0	3	0	0	2.3	2	0	0	0	0	0	14	12	6	1	10	1	5	6	1.94	3.3	4	1	0
175	25	175	62	20.2449	1	0	0.972	-0.9	-0.9	0.687	-2.2	-2.3	-2.3	-2.3	0.69	0	0	0	0	0	1	1	6	7	-1	0	1	0	1	0	0	0	0	3	0	22	1	32	1.64	2	4	1.51	2.7	2.5		0
176	40	171	65	22.2291	0	0	1.057	-0.5	-0.6	0.761	-1.4	-1.5	-1.1	-1.2	0.836	0	0	0	0	0	0	0	6	6	0	0	1	0	0	0	0	0	0	19	8	21	1	42	2.85	6	6	2.52	4.1	2		0
177	18	158	50	20.0288	0	0	1.175	0.5	1.1	0.65	-2.3	-1.9	-3.6	-3.2	0.505	0	0	0	0	1	1	1	6	6	-1	0	5	1	1	0	0	0	0	2	2	16	1	2	0.316	10	9	2.04	7	2.5	1
178	37	163	60	22.5827	0	0	1.168	0.4	0.2	0.866	-0.5	-0.7	-0.2	-0.3	0.944	0	0	0	0	0	1	1	6	5	0	0	1.2	2	0	0	0	0	0	20	4	17	0	15	0.1	5	6	2.96	5.1	2	0	0
179	29	156	52	21.3675	0	0	1.16	0.4	0.7	0.83	-0.8	-0.6	-0.9	-0.7	0.855	0	0	0	0	0	0	0	4	6	0	0	5	1	0	0	0	0	0	5	5	24	1	27	3.81	6	6	2.85	4.5	4	0	6
180	24	177	80	25.5354	0	0	1.044	-0.6	-0.4	0.859	-0.6	-0.5	-0.9	-0.8	0.854	1	15	1	1	0	0	0	5	5	0	4	1.1	1	1	1	1	2	2	3	2	21	1	14	0.617	5	5	2.05	6.1	3	0	0
181	18	182	70	21.1327	1	0	0.85	-1.9	-2.2	0.965	-0.1	-0.4	-0.1	-0.2	0.977	0	0	0	0	0	1	1	5	5	-1	0	1.3	0	0	0	0	0	0	11	8	7	1	7	0.446	6	6	1.77	3.6	2.5	0	0
182	37	178	70	22.0932	1	0	0.88	-1.7	-1.6	1.053	0.6	0.8	0.2	0.2	1.018	0	0	0	0	0	0	0	4	6	0	0	1.2	0	0	0	0	0	0	4	4	33	1	25	1.02	8	8	2.53	4.415	4	0	5
183	26	170	55	19.0311	1	0	0.789	-2.4	-2.2	0.732	-1.9	-1.8	-2.3	-2.2	0.692	1	6	1	2	0	1	1	2	4	0	0	1.1	1	0	0	0	0	0	8	8	18	1	14	1.08	3	4	1.48	2.4	3	1	23
184	19	180	83	25.6173	1	1	0.861	-1.8	-2.2	0.853	-0.9	-1.3	-1.9	-1.4	0.817	0	0	0	0	0	1	1	5	6	0	0	1.5	1	0	0	0	0	0	3	2	16	1	6	1.1	8	5	2.2	2.85	4	1	0
185	34	170	70	24.2215	1	0	1.354	2.3	2.3	1.193	1.7	1.8	1.3	1.3	1.164	0	0	0	0	0	0	0	6	6	0	0	0	0	0	0	0	0	0	3	0	31	1	6	0.564	4	3	1.28	2.5	2	0	0
186	29	170	80	27.6817	1	0	0.674	-4.2	-5.1	0.755	-1.5	-2	-1.4	-1.9	0.753	0	0	0	0	0	0	0	4	5	0	0	1.2	1	1	0	0	0	0	11	6	18	1	3	0.735	5	5	1.9	4.2	3	0	3
187	26	174	78	25.763	1	0	0.941	-1.2	-1.5	1.005	0.2	-0.1	0.4	0.3	1.046	0	0	0	0	0	0	1	6	3	0	0	0	1	1	0	0	0	0	11	11	15	1	25	1.35	5	5	2.06	4	3		2
188	31	172	110	27.1823	1	0	1.312	1.9	1.1	0.841	-1.1	-1.5	-0.9	-1.3	0.857	1		4	4	0	0	1	0.5	2.5	0	150	0.4	5	0	1	1	15	10	5	5	26	1	5	0.738	3	4	1.25	2.2	4	1	64
189	42	176	60	19.3698	1	1	1.075	-0.1	0.4	1.017	0.3	0.8	-0.3	-0.2	0.946	0	0	0	0	0	0	0	3	3	0	0	0	4	0	0	0	0	0	10	9	32	1	7	0.633	5	5	1.86	4	4	0	33
190	34	166	63	22.8625	1	0	0.993	-0.7	-0.8	0.987	0.1	0.1	-0.6	-0.6	0.917	1		4	4	0	0	0	2.5	3	0	44	4.5	3	0	1	1	11	4	4	2	30	1	5	0.178	3	3	0.92	2.3	3	0	12
191	44	165	65	23.8751	0	0	1.191	0.6	0.2	0.908	-0.2	-0.2	-0.5	-0.6	0.908	0	0	0	0	0	0	0	3	4	-1	0	1.4	3	0	0	0	0	0	10	1	34	1	22	0.612	6	7	2.12	4.5	2.5	0	7
192	43	164	53	19.7055	0	0	1.014	-0.8	-0.5	0.715	-1.8	-1.4	-1.9	-1.6	0.726	0	0	0	0	0	0	1	3	3	0	0	0	2	1	0	0	0	0	6	6	37	1	7	0.1	1	3	0.61	1.5	3		4
193	23	166	50	18.1449	0	0	1.023	-0.8	-0.6	0.979	0.4	0.5	-0.7	-0.7	0.902	0	0	0	0	0	0	1	7	6	0	0	0.6	1	1	0	0	0	0	3	3	20	1	8	0.1	4	5	1.52	3.7	3	0	0
194	27	171	65	22.2291	1	0	1.233	1.3	1.3	0.985	0.1	0	-0.7	-0.7	0.902	0	0	0	0	0	0	0	1	0.7	0	0	0	6	0	0	0	0	0	10	8	17	1	13	1.4	8	8	3.05	6.6	4	1	7
195	35	166	59	21.4109	0	0	1.128	0.1	0.1	0.967	0.3	0.3	0.4	0.4	1.031	0	0	0	0	0	0	0	7	3	0	0	0	3	0	0	0	0	0	1	0	34	1	2	0.1	2	2	0.77	2.1	2		0
196	43	170	85	29.4118	1	0	1.287	1.7	1.4	1.13	1.2	1.2	0.8	0.7	1.091	1	15	3	2	1	1	1	2.5	3	0	0	1.1	6	0	0	0	0	0	18	18	25	1	97	2.8	6	6	2.71	5.4	4	1	58
197	27	175	74	24.1633	1	0	0.975	-0.9	-1.1	0.821	-1.2	-1.4	-1.6	-1.7	0.781	0	0	0	0	0	0	0	3	9	0	0	1.2	1	0	0	0	0	0	10	6	17	1	7	2.56	6	6	2.62	4.2	3	1
198	23	165	53	19.4674	1	0	0.882	-1.7	-1.5	0.831	-1.1	-1.2	-0.9	-1	0.855	0	0	0	0	0	0	1	7	4	0	0	0.5	4	0	0	0	0	0	6	6	17	1	11	1.36	5	5	2.44	4.6	4	1	27
199	26	172	70	23.6614	1	0	1.127	0.4	0.2	0.936	-0.3	-0.5	-0.5	-0.6	0.924	1		4	4	0	0	1	5	5	0	260	1.5	1	0	1	1	13	20	3	1	23	1	63	4.57	10	10	3.93	6.3	3	0	0
200	23	170	72.5	25.0865	1	0	1.143	0.5	0.3	1.043	0.5	0.2	0.5	0.4	1.054	0	0	0	0	0	0	1	5	6	0	0	2	0	0	0	0	0	0	7	7	16	1	63	5.74	3	4	2.32	3.9	2		0
201	35	170	53	18.3391	1	0	0.912	-1.4	-1.9	0.983	0	-0.2	0.1	-0.1	1.005	0	0	0	0	0	0	0	7	6	0	0	0	0	0	0	0	0	0	5	1	30	1	4	0.203	2	2	0.77	1.7	3		2
202	44	164	58	21.5645	0	0	1.114	0	0	0.962	0.3	0.5	-0.2	0	0.946	0	0	0	0	0	0	0	7	6	-1	0	0	1	0	0	0	0	0	10	0	34	1	3	0.15	3	2	0.72	1.5	2.5		0
203	30	178	70	22.0932	1	0	0.881	-1.7	-1.7	1.017	0.3	0.3	-0.2	0	0.946	0	0	0	0	0	0	1	7	6	0	0	0.2	2	0	0	0	0	0	4	3	26	0	10	0.126	2	3	0.92	2.2	2	0	3
204	31	175	91	29.7143	1	0	1.01	-0.6	-1.2	1.096	0.9	0.6	1.1	0.9	1.132	0	0	0	0	0	0	1	4	6	0	0	1.6	4	0	0	0	0	0	17	0	14	1	25	5.59	6	7	2.94	4	4	1	34
205	24	172	52	17.5771	1	0	0.894	-1.6	-2	1.087	0.8	0.5	0.6	0.4	1.066	1		4	4	0	1	1	7	6	0		1.3	1	0	1	1		20	3	0	21	1	10	1.8	5	5	1.96	3.4	3	1	0
206	18	172	72	24.3375	1	0	1.033	-0.4	-0.7	0.788	-1.5	-1.8	-0.7	-0.8	0.898	0	0	0	0	0	1	1	7	6	0	0	0	4	0	0	0	0	0	3	1	15	1	6	1.43	4	4	1.93	3.2	4	1	6
207	33	171	68	23.255	1	0	1.607	4.4	4.4	1.072	0.7	0.8	0	0	0.994	0	0	0	0	0	1	0	5	6	0	0	1.9	5	0	0	0	0	0	20	5	13	1	18	2.64	6	5	2.3	4	4	1	72
208	39	165	65	23.8751	1	0	0.959	-1.3	0.4	0.814	-0.7	1.5	-2.4	-0.3	0.645	1		4	4	1	0	0	4	4	0	100	0	4	1	1	1	10	10	20	20	19	1	3	0.501	4	5	1.39	2.1	4		72
209	30	164	53.5	19.8914	0	0	1.272	1.3	1.7	0.976	0.4	0.7	-0.6	-0.3	0.903	0	0	0	0	0	0	0	7	6	0	0	0.8	2	0	0	0	0	0	3	3	27	1	18	0.758	2	3	1.25	2.3	2		1
210	55	177	80.5	25.695	1	0	1.403	2.7	3.3	1.273	2.3	3.2	1.2	1.2	1.098	0	0	0	0	0	1	1	5	6	0	0	0.9	3	0	0	0	0	0	8	8	47	1	2	0.125	3	3	0.87	0.9	3	0	31
211	23	158	61	24.4352	1	0	1.072	-0.4	-0.5	0.928	0	-0.1	0	-0.1	0.971	0	0	0	0	0	1	1	7	6	0	0	0	1	0	0	0	0	0	12	6	11	1	16	2.08	4	4	1.78	2.5	4	1	0
212	21	185	90	26.2966	1	1	1.044	-1.1	-2.8	1.097	1.1	0.1	0.8	-0.1	1.049	0	0	0	0	0	1	0	5	6	0	0	1.2	0	0	0	0	0	0	11	4	10	1	27	4.45	4	4	2.61	4.1	2	1	0
213	32	160	48	18.75	0	0	1.02	-0.8	-0.1	0.814	-0.9	-0.5	-0.1	-0.6	0.84	0	0	0	0	1	1	1	7	6	0	0	0.5	1	0	0	0	0	0	10	10	22	0	2	0.1	2	2	0.62	1.8	3	0	0
214	29	178	70	22.0932	1	0	1.202	1	1	0.8	-1.4	-1.4	-1.8	-1.8	0.754	0	0	0	0	0	0	0	5	6	0	60	0	1	0	1	1	6	10	2	2	27	1	15	1.31	5	4	2.01	3.5	3	1	0
215	19	178	75	23.6713	1	1	1.085	0	-0.1	1.063	0.7	0.4	0.3	0.3	1.036	0	0	0	0	0	1	1	5	4	0	0	2	5	0	0	0	0	0	4	4	15	1	7	1.4	6	5	1.99	3.2	2	0	2
216	43	172	78	26.3656	1	0	1.135	0.4	0.5	0.977	0	0.3	0.2	0.2	1.019	0	0	0	0	0	0	1	7	6	0	0	0	1	0	0	0	0	0	4	1	39	1	8	1.11	4	5	1.87	3.5	2		2
217	33	170	70	24.2215	1	0	0.859	-1.9	-1.9	0.902	-0.6	-0.5	-0.8	-0.9	0.881	1	10	1	1	0	0	1	1	6	0	200	0.4	4	0	1	1	20	10	4	4	29	1	20	1.42	5	4	1.99	2.3	4		11
218	39	170	68	23.5294	1	0	1.099	0.1	0.4	0.796	-1.4	-1.1	-1.5	-1.4	0.795	1		4	4	0	0	1	7	8	0	100	0.2	4	0	1	1	10	10	20	9	19	1	13	1.8	5	5	2.1	4	4		8
219	22	173	83	27.7323	1	0	0.885	-2.5	-3.1	0.82	-0.1	-1.6	-0.9	-1.5	0.819	0	0	0	0	0	1	1	4	6	-1	0	1.2	0	0	0	0	0	0	7	7	15	1	46	2.37	5	6	2.61	5.5	3.5	1	1
220	26	176	62.5	20.1769	1	0	1.149	0.3	0.1	1.005	0.6	0.5	0.6	0.5	1.057	0	0	0	0	0	0	0	7	6	0	0	0.8	4	0	0	0	0	0	6	5	20	1	25	1.37	4	5	1.94	3.2	3	0	0
221	21	182	70	21.1327	1	0	0.869	-2.6	-2.4	0.962	0.1	-0.2	-0.1	-0.2	0.977	0	0	0	0	0	0	0	7	6	0	0	2.1	1	1	0	0	0	0	13	7	8	1	22	2.24	5	3	2.75	5.7	3	0	0
222	35	170	80	27.6817	1	0	1.093	0.1	-0.1	0.954	-0.2	-0.2	-0.7	-0.8	0.895	0	0	0	0	0	0	0	5	4	0	0	3	5	0	0	0	0	0	7	7	28	1	2	0.1	3	3	1.03	2.4	3		0
223	23	182	65	19.6232	1	0	1.012	-1.4	-2.1	1.108	0.5	0.1	0.1	-0.5	1.026	0	0	0	0	0	0	0	7	6	0	0	1.2	2	0	0	0	0	0	2	2	21	1	34	2.77	6	6	2.21	3	4		12
224	24	170	62.5	21.6263	1	0	0.87	-1.8	-1.8	0.749	-1.8	-1.9	-1.6	-1.6	0.783	0	0	0	0	0	1	0	6	5	1	0	0	1	0	0	0	0	0	9	8	15	1	44	2.09	4	3	1.82	3.5	3.5		0
225	29	162	70	26.6728	1	0	1.449	3.1	3.2	1.271	2.3	2.7	2.4	2.5	1.303	0	0	0	0	0	0	1	4	1	0	200	2.5	3	1	1	1	10	20	4	4	25	1	31	1.91	5	5	2.18	3.1	3	0	0
226	30	173	86	28.7347	1	0	0.947	-1.9	-1.1	0.907	-0.9	-0.5	-0.9	-0.8	0.893	0	0	0	0	0	1	0	6	6	0	0	1.5	0	1	0	0	0	0	12	12	18	1	26	1.38	6	4	2.09	3.6	2		0
227	25	175	90	29.3878	1	0	1.108	0.2	-0.4	1.063	0.7	0.2	0.8	0.6	1.097	0	0	0	0	0	0	1	7	6	0	0	0.9	2	1	0	0	0	0	4	1	21	1	24	0.984	7	5	2.19	2.8	2	0	0
228	25	165	55	20.202	0	0	1.023	-0.8	-0.6	0.979	0.4	0.5	0.3	0.4	1.01	0	0	0	0	0	0	1	5	5	0	0	1.4	0	1	0	0	0	0	5	5	20	1	11	0.225	3	3	0.94	2	2		0
229	31	172	110	27.1823	1	0	0.969	1.8	-3.9	0.885	-0.5	-1.5	-0.9	-1.3	0.857	1	10	1	1	0	0	1	1.5	3	0	200	2.1	3	0	1	1	10	20	7	5	24	1	25	2.03	6	6	2.22	3.6	2	0	2
230	25	156	95	29.0368	0	0	1.237	1.2	1.8	1.196	2.2	2.7	-1.9	-1.7	0.725	0	0	0	0	1	1	1	6	6	0	0	0	0	1	0	0	0	0	7	6	18	1	27	1.37	3	2	1.42	1.8	2	0	0
231	51	162	65	24.7676	0	0	0.876	-2	-1.7	0.653	-2.3	-1.9	-1.9	-1.7	0.725	0	0	0	0	0	0	1	5	4	0	0	0	3	0	0	0	0	0	4	1	47	0	29	1.83	3	4	1.61	2.5	3		29
232	30	168	53	18.7783	1	1	0.823	-3	-2.2	0.709	-2.4	-2.1	-2.8	-2.5	0.66	0	0	0	0	0	1	1	3	6	0	0	1	3	0	0	0	0	0	16	10	14	1	16	2.49	5	5	2.29	3.4	4		17
233	44	164	53	19.7055	0	0	1.019	-0.8	-0.5	0.884	-0.4	0.1	-0.5	-0.2	0.904	0	0	0	0	0	0	1	7	6	0	0	0.4	0	1	0	0	0	0	10	5	34	1	2	0.1	2	2	0.74	2	2	1	0
234	45	165	67.5	24.7934	1	0	1.012	-1.4	-1.6	0.685	-2	-1.8	-2.2	-2	0.667	0	0	0	0	0	1	1	2.5	5	0	0	0.9	3	0	0	0	0	0	20	20	25	1	34	5.37	7	7	3.24	4.3	4		18
235	62	170	53	18.3391	1	0	1.348	2	0.7	1.132	1.7	1.1	1.7	1.1	1.2	0	0	0	0	0	0	0	6	4	0	0	1.2	4	0	0	0	0	0	20	11	42	1	16	0.903	4	4	1.65	2.7	4	1	7
236	49	155	65	27.0552	0	0	1.06	-0.5	-0.4	0.898	-0.3	0	-0.5	-0.4	0.7	0	0	0	0	0	0	1	5	6	0	0	0	0	0	0	0	0	0	1	0.5	48	0	2	0.228	5	5	1.7	2.2	2
237	24	175	67.5	22.0408	1	0	1.24	1.3	1.2	1.181	1.6	1.4	1.5	1.4	1.18	0	0	0	0	0	0	1	5	6	0	0	0	3	0	0	0	0	0	6	6	18	1	2	0.1	2	2	0.72	3.6	3
238	37	170	80	27.6817	1	0	0.957	-1.9	2.6	0.822	-0.9	-1.3	-0.5	-0.8	0.874	0	0	0	0	0	0	1	2	3	0	0	0	0	0	0	0	0	0	10	7	27	1	5	2.87	3	3	1.6	2.2	3		2
239	32	172	70	23.6614	1	0	0.875	-2.5	-2.5	0.68	-2.1	-2.1	-2.3	2.4	0.636	1	10	1	1	0	0	0	5	6	0	100	1.4	4	0	1	1	10	10	20	20	12	1	5	0.1	3	3	0.87	2.2	4		4
240	32	178	70	22.0932	1	0	1.087	-0.8	-0.4	0.899	-0.4	0.4	-0.4	-0.5	0.945	1	10	1	1	0	1	1	3	3	0	0	4	2	0	0	0	0	0	10	10	22	1	17	1.91	3	0	1.1	2.4	4		72
241	36	178	83	26.1962	1	0	0.885	-2.4	-2.3	0.87	0	0.1	-0.3	-0.4	0.986	0	0	0	0	0	0	1	3	4	0		5	0	0	1	1			7	7	29	1	13	0.602	6	4	2.56	2.4	2	0	0
242	50	135	41	22.4966	0	0	1.058	-0.5	0.6	0.72	-1.8	-0.8	-2.8	-2.1	0.605	0	0	0	0	0	1	1	2	1	0	0	6.9	8	1	0	0	0	0	25	25	25	1	8	0.411	5	5	2.23	6.4	4	1	54
243	37	165	61	22.4059	0	0	1.094	-0.7	-0.2	0.766	-2	-1.4	-1.7	-1.4	0.788	0	0	0	0	0	1	1	4	5	0	0	0.6	0	0	0	0	0	0	1	1	36	1	7	0.144	6	6	1.9	4.15	2	0	0
244	56	150	50	22.2222	0	0	0.955	-1.3	0	0.709	-1.8	-0.7	-2	-1.1	0.72	0	0	0	0	0	1	0	3	5	0	0	2.2	2	1	0	0	0	0	7	7	49	1	86	4.39	10	10	5.78	9.4	4	0	24
245	35	160	65	25.3906	0	0	1.288	1.4	1	1.011	0.7	0.4	-0.8	-1	0.877	0	0	0	0	0	1	1	4	1.5	0	0	4.2	5	1	0	0	0	0	23	18	12	1	16	0.434	5	5	1.9	1.7	3	1	30
246	30	168	90	21.8878	1	0	1.186	0.1	-1.5	1.102	1.2	0.3	1.3	0.5	1.115	1	10	1	1	0	0	1	6	5	0	130	4.2	1	1	1	1	13	10	5	5	25	1	28	5.64	4	2	2.06	2.3	3		0
247	28	178	85	26.8274	1	0	1.092	0.1	-0.4	1.06	0.6	0.3	-0.8	-1	0.877	0	0	0	0	0	0	0	8	3.5	0	450	0.3	0	0	1	1	15	30	5	5	23	1	2	1.09	2	2	0.88	1.6	2	0	0
248	54	169	60	21.0077	1	1	1.298	1.8	2.5	1.102	1	1.8	1.3	1.6	1.165	0	0	0	0	0	1	1	2	4	0	1280	7.5	5	0	1	0	32	40	27	13	27	1	34	3.1	9	10	3.59	5.6	3	0
249	25	171	55	18.8092	1	1	1.067	-0.9	-1.5	0.87	-0.6	-0.4	-1.1	-0.9	0.801	0	0	0	0	0	0	0	8	3	0	0	0	1	1	0	0	0	0	0	0	25	1	5	1.52	8	8	2.19	3	3	0	0

## Sheet: validation set 
number	lbmd	lt	lz	fnbmd	fnt	fnz	hipt	hipz	hipbmd	occupation_a	alcohol_history	alcohol_duration	alcohol_frequency	dalliy_alcohol	history_of_ibd	history_of_psoriasis	history_of_aau	history_tnf_i	history_cdmards	history_nsaids	history_glucocorticoid	current_tnf_i	current_cdmards	current_nsaids	current_glucocorticoid	current_chinese_medicine	chesst_expansion	modified_schober	basri_lumbar	basri_cervical	asymmetricsacroiliitis	smoking_index	basfi	basmi	basri_spine	age	height	weight	bmi	gender	occupation	sport	family_history	ever_smoking	current_smoking	smoke_duration	cigarettes_per_day	duration_of_symptoms	duration_of_diagnosis
1	1.062	-0.2	-0.3	0.841	-1.1	-1.1	-1	-1.1	0.858	1	0	0	0	0	0	0	0	0	0	1	0	0	0	0	0	1	7	6	0	0	1	0	0.9	5	2.5	29	174	72.5	23.95	1	1	0	1	0	0	0	0	2	2
2	1.378	2.2	2.1	1.071	1.2	1.1	1.4	1.3	1.156	1	0	0	0	0	0	0	0	0	1	1	0	0	0	1	0	0	2	4	3	0	0	70	0.7	3	6	25	159	59	40.1	0	1	0	0	1	1	10	7	10	5
3	1.135	0.4	0.5	0.977	0	0.3	0.3	0.3	1.033	1	1	10	0	0	0	0	0	0	1	1	0	0	0	1	0	0	1.5	0.5	3	4	0	0	1	6	11	45	170	78	26.99	1	1	0	0	0	0	0	0	4	4
4	0.902	-1.8	-1.6	1.014	0.7	0.8	0.6	0.7	1.049	3	1	14	1	0	0	0	0	0	0	1	0	0	0	1	0	0	5	6	0	0	0	0	0.2	0	2	28	175	55	17.96	1	1	1	0	0	0	10	20	5	5
5	1.288	1.4	1	1.011	0.7	0.4	-0.8	-1	0.877	0	0	0	0	0	0	0	0	0	1	0	0	0	0	0	0	1	4	8	0	0	0	0	4.2	0	2	35	160	65	25.39	0	0	0	1	0	0	0	0	23	23
6	1.093	0.1	-0.1	0.954	-0.2	-0.2	-0.7	-0.8	0.895	5	0	0	0	0	0	0	0	0	0	0	0	0	0	1	0	0	3	4	0	0	0	8	3.9	3	3	36	171	80	27.36	1	1	0	0	0	0	1	8	8	8
7	1.176	0.5	0.7	0.773	-1.3	-1.2	-1.4	-1.3	0.797	1	0	0	0	0	0	0	0	0	0	0	0	0	0	0	0	1	3.5	2	2	0	2	200	0.3	3	5	34	168	100	35.43	1	1	0	0	1	0	0	0	18	10
8	1.149	-0.3	-0.6	0.96	-0.6	-0.7	-0.4	-1	0.952	10	1	13	0	1	0	0	0	0	0	0	0	0	0	0	0	1	5	5	3	0	0	0	0	1	5	38	172	60	20.28	1	2	1	0	0	0	0	0	7	3
9	1.12	0.3	0.1	0.955	-0.2	-0.2	-0.4	-0.5	0.935	5	0	0	0	0	0	0	0	0	0	0	0	0	0	0	0	1	7	2.5	4	4	0	0	4.5	3	12	33	170	70	32.1	1	1	0	1	0	0	0	0	16	10
10	1.114	0.3	0.8	0.608	-2.8	-2.1	-2.3	-2	0.698	1	0	6	0	0	0	0	0	0	0	0	0	0	0	1	0	0	7	7	0	0	0	0	0.2	2	2	36	174	82	27.08	1	1	0	0	0	0	0	0	14	10
11	1.049	0.3	-1	1.019	0.3	-0.1	0.2	-0.1	1.011	3	1	10	1	0	0	0	0	0	1	0	0	0	0	0	0	0	2	2	0	0	0	0	4.5	0	3	45	184	73	21.56	1	1	0	0	0	0	10	12	20	20
12	1.476	3.3	2.6	1.195	1.7	1.4	1.5	1.3	1.185	10	0	8	0	1	0	0	0	0	0	0	0	0	0	1	0	0	3.5	5	4	0	0	0	1.1	3	7	31	160	48	32.1	0	2	0	0	0	0	15	40	3	3
13	1.826	1.8	2.3	1.096	1.4	2.1	0.3	0.9	1.015	5	0	0	0	0	0	0	0	0	1	0	0	0	0	1	0	0	4	7	0	0	0	100	7.7	0	2	45	178	70	22.09	1	1	0	0	1	1	0	0	15	10
14	1.201	1	1	0.8	-1.4	-1.4	-1.8	-1.8	0.754	10	1	3	0	0	0	0	0	0	0	0	0	0	0	1	0	0	4	4	0	0	0	0	0	2	2	20	170	68	23.53	1	2	0	0	0	0	12	30	12	10
15	1.495	3.4	3.8	0.824	-1.2	-0.7	-1.5	-1.4	0.798	3	1	4	0	1	0	0	0	1	1	1	0	1	0	0	0	1	4.5	3	0	0	0	0	0	3	2	28	170	55	19.03	1	1	0	0	0	0	0	0	3	3
16	1.219	0.9	1.1	1.057	1.1	1.2	1.2	1.3	1.131	9	0	0	0	0	0	0	0	0	0	0	0	0	0	1	0	0	3	3	2	0	0	0	3.3	3	6	36	178	85	26.83	0	2	0	0	0	0	18	20	3	3
17	1.092	0.1	-0.4	1.06	0.6	0.3	0.2	0	1.013	5	1	0	0	0	0	0	0	0	1	0	0	0	0	1	0	0	3	8	0	0	0	0	0	0	2	32	165	80	38.1	0	1	1	0	0	0	0	0	23	10
18	1.128	0.1	-1.2	0.939	-0.1	-0.8	0.5	-0.3	1.042	1	0	0	0	0	0	0	0	0	0	1	0	0	0	1	0	0	6	6	0	0	1	0	0.3	3	2.5	32	172	70	23.7	1	1	0	1	0	0	0	0	2	2
19	0.841	2.8	-2.6	0.653	-2.3	2.4	-2.3	-2.4	0.636	10	1	3	1	0	0	0	0	1	1	1	0	0	0	1	0	0	6	2	2	2	1	200	8.4	2	6.5	30	169	60	35.1	1	2	1	0	1	0	10	20	8	8
20	1.298	1.8	2.5	1.102	1	1.8	1.3	1.6	1.165	3	1	2	1	0	0	0	0	0	0	0	0	0	1	1	0	0	4	4	4	4	0	0	5	3	12	49	156	57	23.42	0	1	0	0	0	0	40	5	0	0
21	1.128	0.1	0.1	0.967	0.3	0.3	0.4	0.4	1.031	1	0	0	0	0	0	0	0	0	0	0	0	0	0	1	0	0	7	8	8	3	0	0	4	0	3	32	160	55	31.1	0	1	0	1	0	0	0	0	0	0
22	1.087	-0.2	-0.2	0.932	-2.8	-2.6	-1.9	-2	0.834	3	0	0	0	0	0	0	0	0	0	0	0	0	0	1	0	0	3	2	0	0	0	0	0.6	2	4	37	170	65	22.49	1	1	0	1	0	0	0	0	0	0
23	1.18	0.8	1	0.897	-0.6	-0.2	-0.6	-0.5	0.911	5	0	0	0	0	0	0	0	0	0	0	0	0	0	1	0	0	0	3	4	0	0	0	0.3	5	8	48	178	70	22.09	1	1	1	0	0	0	0	0	25	20
24	1.128	0.4	-0.2	0.859	-0.9	-1.2	-0.4	-0.5	0.945	1	1	20	1	0	0	0	0	0	0	0	0	0	0	0	0	1	7	5	0	0	0	0	0.3	0	2	33	165	61	22.41	0	1	1	0	0	0	0	0	14	10
25	1.182	0.6	0.4	0.933	0	-0.1	0.7	0.6	1.062	5	0	0	0	0	0	0	0	0	0	1	0	1	0	0	0	1	3	3	4	4	0	0	3.4	7	12	36	173	75	25.06	1	1	1	1	0	0	0	0	5	3
26	1.332	2.1	2.1	0.962	-0.1	0.2	0.3	0.3	1.026	1	0	0	0	0	0	0	0	1	1	1	0	0	0	0	0	0	6	2	0	0	0	0	5.1	0	2	32	171	72	24.62	1	1	0	0	0	0	0	0	9	9
27	1.393	2.6	2.5	1	0.2	0.2	0.1	0.1	1.003	3	0	0	0	0	0	0	0	0	0	0	0	0	0	0	0	1	5	5	4	4	0	200	1.1	7	12	41	172	75	33.1	1	1	0	0	1	1	0	0	1	1
28	1.344	2.2	2.1	0.802	-1.4	-1.3	-1	-1	0.861	5	0	0	0	0	0	0	0	0	0	0	0	0	0	0	0	1	5	8	2	0	0	0	7.9	2	4	25	164	58	38.1	0	1	0	0	0	0	0	0	2	2
29	0.946	-1.4	-1.5	0.811	-1	-1.1	-0.5	-0.6	0.905	9	0	0	0	0	0	0	0	0	0	0	0	0	1	1	0	0	2	6	0	0	0	0	0.3	0	2	26	164	58	21.56	0	2	1	0	0	0	0	0	1	1
30	1.026	-0.7	-0.7	0.888	-0.3	-0.2	-0.3	-0.3	0.931	10	1	20	1	1	0	0	0	0	0	1	0	0	1	1	0	0	2	2	4	3	0	0	6.9	2	10	50	171	82.5	28.21	1	2	0	1	0	0	20	20	26	23
31	0.973	-1.7	-2.3	0.918	-0.9	-1.3	-1.2	-1.8	0.859	1	1	2	0	0	0	0	0	0	1	1	0	0	1	1	0	0	1	2	0	0	0	200	0	0	2	25	175	90	41.1	1	1	0	0	1	1	10	20	4	4
32	1.108	0.2	-0.4	1.063	0.7	0.2	0.8	0.6	1.097	3	1	10	1	0	0	0	0	0	0	0	0	0	0	0	0	1	3	7	4	2	0	300	0.5	0	10	42	140	42	21.43	0	1	0	0	1	1	9	5	10	5
33	0.863	-2.1	-0.6	0.656	-2.3	-1	-2.9	-1.8	0.597	3	0	0	0	0	0	0	0	1	1	1	0	1	0	0	0	1	3	3	2	3	0	0	1.8	3	9	31	182	63	19.02	1	1	1	0	0	0	0	0	4	1
34	1.064	-0.2	-0.1	1.066	0.7	0.6	0.3	0.3	1.036	10	1	2	0	0	0	0	0	0	1	1	0	0	1	1	0	0	6	3	3	0	0	300	2.9	4	6	30	173	90	33.1	1	2	0	0	1	1	0	0	5	3
35	1.254	1.4	1.3	1.068	0.7	1	0.2	0.2	1.016	5	0	0	0	0	0	0	0	0	0	0	0	0	0	1	0	0	5	3	2	0	0	0	3.1	2	5	25	155	52	21.64	0	1	1	1	0	0	0	0	11	11
36	1.247	1.1	1.5	0.95	0.2	0.4	-0.5	-0.3	0.905	9	0	0	0	0	0	0	0	0	0	1	0	0	0	1	0	0	4	2	0	0	0	0	1.8	0	3	39	150	58	41.1	0	2	0	0	0	0	3	7	13	13
37	0.955	-1.3	0	0.709	-1.8	-0.7	-2	-1.1	0.72	9	0	0	0	0	0	0	0	0	0	1	0	0	0	1	0	0	5	4	2	2	1	50	0.6	4	6.5	44	167	62.5	41.1	1	2	0	0	0	0	0	0	23	23
38	1.014	-0.3	0.3	0.948	-0.2	0.6	0.1	0.3	0.999	3	0	0	0	0	0	0	0	0	1	0	0	0	0	1	0	0	2	6	0	0	0	0	0.3	0	2	46	170	84.5	36.1	1	1	1	1	0	0	0	0	11	11
39	1.325	2	1.6	1.196	1.7	1.5	1.6	1.5	1.199	5	0	0	0	0	0	0	1	0	0	1	0	0	0	0	0	1	3	6	2	2	-1	0	4	1	7.5	30	180	106	32.72	1	1	0	0	0	0	0	0	6	6
40	1.017	-0.5	-1.4	0.869	-0.8	-1.3	-0.9	-1.1	0.875	9	1	5	1	1	0	0	1	0	1	1	0	0	0	0	0	0	6	2	0	0	0	0	0	0	3	28	170	50	17.3	0	2	1	0	0	0	0	0	6	6
41	0.89	-1.6	-1.3	0.783	-1.5	-1.4	-2.2	-2	0.711	1	1	5	1	1	0	0	0	0	1	1	0	0	0	1	0	0	3	6	2	2	0	0	0	1	7	27	158	57	22.83	0	1	0	0	0	0	0	0	1	1
42	1.243	1.1	0.8	0.84	-0.8	-0.9	-0.4	-0.5	0.925	5	0	0	0	0	0	0	0	1	1	1	0	0	0	1	0	0	0.5	4	4	4	0	0	2.6	6	12	36	177	63	42.1	1	1	0	0	0	0	0	0	11	10
43	1.147	0.5	0.9	0.969	-0.1	0.4	-1.7	-1.8	0.7269	0	0	0	0	0	0	0	0	0	0	0	0	0	0	1	0	0	4	3	0	0	0	0	0.9	3	2	35	177	76	24.26	1	1	0	0	0	0	0	0	15	15
44	1.072	-0.1	0.1	0.903	-0.6	-0.2	-0.8	-0.8	0.887	5	0	0	0	0	0	0	0	0	1	1	0	0	1	1	0	1	5	3	0	0	-1	300	2.6	0	2.5	32	168	90	31.89	1	1	0	0	1	1	3	10	18	12
45	1.186	0.1	-1.5	1.102	1.2	0.3	1.3	0.5	1.115	3	1	14	1	0	0	0	0	0	1	1	0	0	0	0	0	1	4	2	0	0	0	0	3	0	3	34	173	72	24.06	1	1	1	0	0	0	0	0	12	2
46	0.998	-0.7	-0.9	0.815	-1.3	-1.4	-1.1	-1.1	0.853	3	0	0	0	0	0	0	0	0	1	0	0	0	0	0	0	1	2	5	0	0	0	0	1.8	3	2	26	168	26	32.1	1	1	0	0	0	0	0	0	3	3
47	1.014	-0.6	-0.6	1.079	0.8	0.7	4.6	4.6	1.59	10	0	0	0	0	0	0	0	0	0	1	0	0	0	0	0	1	2.5	2	4	4	0	0	0.5	4	11	29	180	79	32.1	1	2	0	0	0	0	0	0	10	3
48	1.299	1.8	1.3	1.152	1.3	0.9	1.8	1.3	1.299	10	1	7	0	0	0	0	0	0	1	1	0	0	0	1	0	1	5	5	0	2	0	0	1.1	0	4	23	166	64	30.1	1	2	0	0	0	0	13	5	10	10
49	1.173	0.8	1	0.854	-1	-0.7	-0.7	-0.7	0.896	10	1	6	1	0	0	0	0	0	1	1	0	1	0	1	0	1	6	2	0	2	0	0	0	0	4	32	175	70	33.1	1	2	1	0	0	0	12	5	8	7
50	1.22	1.2	1.1	1.01	0.2	0.3	-0.1	-0.1	0.983	9	1	10	1	0	0	0	0	0	1	1	0	0	0	1	0	1	4	4	0	0	0	0	7.9	0	2	35	172	64	21.63	1	2	0	1	0	0	0	0	15	14
51	1.01	-0.6	-1.2	1.096	0.9	0.6	1.1	0.9	1.132	3	0	0	0	0	0	0	0	1	1	0	0	0	0	0	0	1	6	6	2	2	0	0	2.7	0	6	28	178	78	43.1	1	1	1	0	0	0	0	0	15	12
52	1.391	2.6	2.4	1.144	1.3	1.2	1.4	1.3	1.17	3	0	0	0	0	0	0	0	1	1	1	0	0	0	1	0	0	5	2	0	0	0	0	3.5	0	2	43	178	57.5	18.15	1	1	0	1	0	0	0	0	12	10
53	1.101	0.2	0.4	0.861	-0.9	-0.8	-0.5	-0.5	0.921	5	1	6	1	1	0	0	0	1	1	0	1	0	0	0	1	0	3	3	4	4	0	200	2.7	4	12	45	165	65	23.88	1	1	0	0	1	1	20	10	10	10
54	1.901	6.8	7.4	1.083	0.8	1.6	0.5	0.7	1.05	5	0	0	0	0	0	0	0	0	0	0	0	0	0	1	0	1	3	3	4	3	0	0	0.8	1	11	35	170	72	24.91	1	1	0	1	0	0	0	0	9	9
55	1.255	1.4	1.4	0.805	-1.3	-1.4	-1.3	-1.4	0.817	3	1	4	0	0	0	0	1	0	1	0	0	0	0	0	0	1	3	2	4	4	0	0	2	2	12	47	162	47	43.1	0	1	0	0	0	0	6	3	5	5
56	0.973	-1.2	-0.4	0.908	-0.2	0.4	-0.6	-0.1	0.895	1	0	0	0	0	0	0	0	0	0	0	0	0	0	1	0	0	3	3	3	0	0	0	0.9	4	7	37	167	61	21.87	0	1	1	0	0	0	0	0	10	10
57	1.048	-0.6	0	0.844	-0.7	-0.1	-0.4	-0.1	0.917	3	1	8	1	1	0	0	0	1	1	1	0	0	1	1	0	1	4	4	0	0	0	0	2.8	3	4	50	155	49	20.4	0	1	1	0	0	0	0	0	25	25
58	1.097	-0.1	0.4	0.897	-0.3	0.1	-0.6	-0.2	0.902	3	0	0	0	0	0	0	0	0	1	1	0	0	0	1	0	1	4	2	2	0	0	0	1.8	0	5	46	168	48	17.01	1	1	0	1	0	0	4	10	0	0
59	0.878	-1.7	-1.2	0.825	-1.2	-0.7	-1.6	-1.4	0.785	1	0	0	0	0	0	0	0	0	0	1	0	0	0	0	0	1	5	2	0	0	0	0	6	0	2	29	166	89	32.3	1	1	0	1	0	0	0	0	20	20
60	1.228	1.2	0.6	0.943	-0.3	-0.6	-0.3	-0.5	0.947	1	0	0	0	0	0	0	0	0	0	1	0	0	0	0	0	1	5	3	2	2	0	0	2.6	1	8	33	156	73	37.1	0	1	0	1	0	0	0	0	6	3
61	1.661	4.6	3.7	1.059	1.1	0.7	1.5	1.1	1.171	1	0	0	0	0	0	0	0	0	1	0	0	0	0	1	0	1	4	4	0	0	0	0	1	3	3	23	168	80	28.34	1	1	0	0	0	0	0	0	5	2
62	0.958	-1	-1.1	0.756	-1.7	-1.6	-1.2	-1.2	0.841	1	0	0	1	0	0	0	0	0	1	0	0	0	0	0	0	1	5	3.5	2	0	0	0	1.7	6	4	32	170	75	25.95	1	1	0	0	0	0	0	0	1	1
63	1.119	-0.5	-0.9	1.032	0.6	0.3	1.2	0.9	1.095	3	1	10	1	1	0	0	1	0	1	1	0	0	0	0	0	1	3	5	4	0	0	0	1.8	4	8	42	153	48.5	41.1	0	1	1	0	0	0	0	0	18	15
64	0.834	-2.3	-1.3	0.769	-1.3	-0.3	-1.8	-1	0.737	3	1	2	0	1	0	0	0	0	1	0	0	0	0	0	0	0	6	3	2	3	0	200	1.5	4	8	34	167	57	20.44	1	1	0	1	1	1	20	30	20	12
65	1.066	-0.1	0.3	0.737	-1.9	-1.6	-1.7	-1.5	0.774	1	0	0	0	0	0	0	0	0	1	0	0	0	0	1	0	0	4	2	2	0	0	0	5.5	5	6	36	170	70	24.22	1	1	0	0	0	0	2	10	8	6
66	0.932	-1.2	-0.8	0.766	-1.6	-1.2	-0.9	-0.8	0.976	3	0	0	0	0	0	0	0	0	1	1	0	0	0	0	0	1	4	6	0	0	0	0	2	6	3	43	155	50	20.81	0	1	0	1	0	0	0	0	13	10
67	1.507	3.5	4	0.728	-2.5	-1.8	-1.8	-1.9	0.754	3	1	0	1	0	0	0	0	0	1	1	0	0	0	1	0	0	6	2	0	0	0	6	2.3	6	4	25	175	76	24.82	1	1	0	1	0	0	2	3	4	2
68	1.148	0.5	0.9	1.103	1	1.4	0.9	1	1.114	5	0	0	0	0	0	0	0	0	1	1	0	0	0	0	0	0	6	2	0	0	0	0	7.9	1	2	30	173	70	23.39	1	1	0	1	0	0	0	0	4	3
69	0.745	-2.8	-2.9	0.985	0.1	0	-1	-1.1	0.855	1	1	10	1	0	0	0	0	0	1	1	0	0	0	1	0	0	1.5	5	0	0	0	0	7.3	0	4	31	180	100	30.86	1	1	1	1	0	0	0	0	24	21
70	1.201	1	0.2	1.245	2.1	1.6	2.1	1.9	1.265	10	1	9	1	1	0	0	0	0	0	0	0	0	0	0	0	0	7	6	0	0	0	0	3.3	1	3	28	177	73	23.3	1	2	0	1	0	0	20	20	8	5
71	0.998	-0.7	-1.1	1.014	0.3	-0.1	0.1	0	1.001	1	0	0	0	0	0	0	0	1	1	0	0	1	0	1	0	0	4	5	0	0	0	80	0	1	4	50	170	85	39.1	1	1	0	0	1	1	0	0	23	22
72	1.09	0.1	-0.4	0.937	-0.3	-0.5	-0.1	-0.2	0.983	9	1	2	0	0	0	0	0	0	1	1	0	0	0	0	0	1	1	3	4	4	0	0	5.7	4	12	31	172	60	20.28	1	2	0	0	0	0	0	0	18	10
73	1.353	2.3	2.6	0.941	-0.3	0.2	-1.2	-1.1	0.835	0	0	0	0	0	0	0	0	0	1	1	0	0	0	1	0	0	2	3	0	0	-1	0	1.6	0	3.5	43	160	46.5	18.16	0	1	1	0	0	0	0	0	13	13
74	1.136	0.2	0.9	0.836	-0.8	-0.3	-0.6	-0.2	0.891	0	1	2	1	0	0	0	1	0	0	0	0	0	0	1	0	0	3	3	2	0	0	20	2.2	0	5	40	160	77	30.08	1	0	1	1	1	1	0	0	7	6
75	1.089	0.1	-0.1	0.927	-1.9	-0.7	-1.8	-1.9	0.764	3	0	0	0	0	0	0	0	0	1	1	0	0	0	0	0	1	2	2.5	4	4	0	200	7	4	12	27	165	57.5	21.12	1	1	0	0	1	1	0	0	6	2
76	1.224	1.2	1.7	0.887	-0.7	-0.1	-1.1	-1	0.842	3	0	0	0	0	0	0	0	0	1	1	0	0	0	1	0	0	2	2	4	0	0	0	1.1	3	8	38	175	64	35.1	1	1	0	0	0	0	25	40	20	10
77	1.308	1.9	1.9	1.064	0.7	0.6	0.7	0.7	1.087	5	0	0	0	0	0	0	0	0	0	1	0	0	0	1	0	0	4	4	3	4	0	0	6.7	6	11	24	168	50	17.72	1	1	0	0	0	0	10	10	6	3
78	1.061	-0.2	0.1	0.519	-3.5	-3.3	-4.1	-4	0.457	5	0	0	0	0	0	0	0	1	1	0	0	0	0	0	0	1	4	3	0	4	0	100	1.6	5	8	31	178	52	16.41	1	1	0	0	1	1	0	0	2	2
79	0.881	-1.7	-1.2	0.724	-2	-1.7	-2.3	-2.2	0.691	1	0	0	0	0	0	0	1	1	1	1	0	0	0	1	0	0	3	6	0	0	0	0	0.3	2	3	40	180	58	17.9	1	1	1	0	0	0	0	0	20	14
80	1.161	0.7	0.9	1.849	6.7	6.8	16.5	16.6	3.137	1	1	20	1	1	0	0	0	0	0	1	0	0	1	1	0	0	3	6	0	0	0	0	0.4	0	2	25	160	46	17.97	0	1	0	0	0	0	0	0	2	2
81	1.077	-0.3	-0.1	0.872	-0.5	-0.4	-0.9	-0.7	0.863	1	0	0	0	0	0	0	0	0	1	1	0	0	0	0	0	1	2	5	0	0	0	0	1.7	0	2	32	172	84	28.4	1	1	1	0	0	0	0	0	10	10
82	0.785	-2.7	-1.4	0.715	-1.8	0.6	-1.2	-0.3	0.814	9	0	0	0	0	0	0	0	0	1	1	0	0	0	0	0	1	2	1	4	4	0	0	2.5	6	12	38	165	61	22.41	1	2	0	0	0	0	0	0	1	10
83	1.414	2.8	2.3	0.651	-2.5	-2.8	-2.5	-2.6	0.669	9	0	0	0	0	0	0	0	0	1	0	0	0	1	0	0	0	1	3	2	0	0	0	5.9	5	6	20	170	83	28.72	1	2	0	0	0	0	0	0	3	3
84	0.857	-1.9	-1.4	0.878	-0.8	-0.3	-0.5	-0.4	0.928	1	0	0	0	0	0	0	0	0	0	0	0	0	0	0	0	1	4	5	2	3	0	0	7.4	2	8	23	172	50	16.9	1	1	0	0	0	0	0	0	2	2
85	1.334	2.1	1.9	1.271	2.3	2.3	2.4	2.3	1.298	3	0	0	0	0	0	0	0	0	0	1	0	0	0	0	0	1	3	4	2	2	0	0	5.1	4	7	33	168	70	24.8	1	1	1	0	0	0	0	0	8	5
86	1.073	-0.1	0.3	0.743	-1.8	-1.6	-2.1	-2	0.716	3	0	0	0	0	0	0	0	1	1	1	0	0	0	0	0	1	3	2	2	0	0	0	1.5	4	4	28	173	75	38.1	1	1	0	1	0	0	0	0	5	5
87	1.385	2.5	2.7	0.847	-1	-0.7	-1	-0.9	0.861	5	1	2	1	0	0	0	0	0	1	1	0	0	0	0	0	1	4	3	0	0	0	0	0	1	3	37	172	74	25.01	1	1	0	0	0	0	0	0	1	1
88	0.917	-1.4	-1.7	0.817	-1.2	-1.6	-0.8	-0.9	0.888	9	1	5	3	1	0	0	0	0	1	0	0	0	1	0	0	0	2	4	4	2	-1	20	0	3	9.5	31	166	80	29.03	1	2	0	0	0	0	0	0	15	15
89	0.944	-1.1	-1.3	0.982	0	-0.1	0.5	0.4	1.052	9	0	0	0	0	0	0	0	0	0	1	0	0	0	0	0	0	2	7	2	0	0	0	9.8	0	5	20	150	45	30.1	0	2	0	0	0	0	0	0	9	4
90	1.158	0.6	0.9	0.854	-1	-0.3	0.1	0.2	0.998	1	0	0	0	0	0	0	0	0	0	0	0	0	0	0	0	1	7	6	0	0	0	0	0.5	0	2	29	150	55	24.44	0	1	0	0	0	0	0	0	8	5
91	1.114	0	-0.8	0.904	-0.2	-0.8	-0.2	-0.7	0.954	3	0	0	0	0	0	0	0	0	1	0	0	0	0	0	0	1	2	3	4	4	0	0	0.7	7	12	30	170	68.5	23.7	0	1	1	0	0	0	20	10	0	0
92	0.924	-1.6	0.1	0.729	-1.7	-0.3	-1.5	-0.5	0.775	3	0	0	0	0	0	0	0	0	1	1	0	0	0	1	0	0	2	3.5	0	4	0	0	1.8	3	7	37	173	57	19	1	1	1	1	0	0	0	0	0	0
93	1.068	-0.4	0.4	0.782	-1.2	-0.7	-1.6	-1.1	0.767	5	0	0	0	0	0	0	0	0	0	0	0	0	0	0	0	1	1	2.5	4	4	0	50	6.7	5	11	38	170	72	24.91	1	1	0	0	1	1	0	0	0	0
94	1.168	0.4	0	0.911	-0.2	0.5	-0.6	-0.9	0.892	5	0	0	0	0	0	0	0	0	0	0	0	0	0	1	0	0	1	4	4	4	0	0	0.2	5	12	38	175	27	8.82	1	1	0	0	0	0	0	0	0	0
95	1.117	0.3	0.5	0.772	-1.6	-1	-1.3	-1.1	0.824	1	0	0	0	0	0	0	0	0	1	0	0	0	1	1	0	0	2	3	0	0	0	0	3.2	3	4	33	160	52	20.31	0	1	0	1	0	0	0	0	3	3
96	1.167	0.7	0.6	1.099	0.9	0.8	0.7	0.7	1.085	3	1	0	1	0	0	0	0	0	0	0	0	0	0	0	0	1	4	4	2	0	0	30	4	1	4	27	160	85	33.2	0	1	0	0	1	1	0	0	0	0
97	1.267	1.5	1.5	0.836	-1.1	-1.1	-1.3	-1.3	0.819	5	0	0	0	0	0	0	0	0	1	0	0	0	0	1	0	0	5	2	0	2	0	0	0.7	3	6	26	162	60	36.1	1	1	0	0	0	0	0	0	0	0
98	1.058	-0.2	-0.2	0.864	-0.9	-0.7	-0.7	-0.7	0.904	3	0	31	0	1	0	0	0	0	0	0	0	0	0	1	0	0	4	3	2	3	0	0	2.7	3	8	36	170	57	34.1	1	1	0	0	0	0	30	20	0	0
99	0.902	-1.8	-1.4	0.776	-1.3	-1	-1.9	-1.6	0.732	1	0	0	1	1	0	0	0	1	0	1	0	0	1	1	0	0	7	4	2	3	0	30	0.3	1	9	27	180	115	35.49	1	1	1	0	1	1	0	0	10	10
100	1.128	0.1	-1.5	0.948	0.2	-1	0	-1	0.981	5	0	0	0	0	0	0	0	0	1	1	0	0	0	1	0	1	5	6	3	0	0	0	4.4	0	5	28	168	65	23.03	0	1	0	1	0	0	0	0	0	0
101	0.974	-0.9	0.1	0.702	-2.1	-0.7	-1.7	-1.1	0.775	1	0	0	0	0	0	0	0	0	0	0	0	0	0	1	0	0	4	3	4	4	-1	0	3.3	2	10.5	31	160	70	27.34	1	1	0	1	0	0	20	10	0	0
102	1.033	-0.4	-0.1	0.84	-1.1	-0.8	-0.2	-0.1	0.968	9	0	0	0	0	0	0	0	0	0	1	0	0	0	1	0	0	4	5	0	0	0	0	1.3	2	4	46	175	80	39.1	1	2	0	0	0	0	3	7	0	0
103	1.005	-0.6	-1.5	1.019	0.3	-0.2	0.7	0.4	1.076	5	0	0	0	0	0	0	0	0	1	0	0	0	0	1	0	0	4	2	2	0	0	0	5.7	0	4	46	160	53	20.7	0	1	1	0	0	0	0	0	0	0
104	1.309	1.6	1.4	0.963	0.3	0.1	0.7	0.6	1.072	0	0	0	0	0	0	0	0	0	0	0	0	0	0	0	0	1	2	6	0	0	0	0	0.1	0	2	33	168	68	24.09	1	0	0	0	0	0	0	0	1	0
105	1.567	4	4	1.093	0.9	0.9	1.3	1.3	1.156	3	1	0	2	0	0	0	0	1	1	1	0	0	0	0	0	1	1	5	4	4	0	0	0.6	4	12	37	150	50	22.22	0	1	0	1	0	0	15	10	8	5
106	1.101	0.2	0.4	0.861	-0.9	-0.8	-0.5	-0.5	0.921	5	0	0	0	0	0	0	0	1	1	1	0	0	0	0	0	1	2	4	0	0	0	20	3.4	1	2	34	179	69	40.1	1	1	0	0	0	0	0	0	0	0
107	1.393	2.6	2.5	1	0.2	0.2	0.1	0.1	1.003	9	0	0	0	0	0	0	0	0	0	0	0	0	0	0	0	0	2	1	4	4	0	0	1.8	3	12	26	160	65	25.39	1	2	0	0	0	0	0	0	0	0
108	1.063	-0.2	-0.7	0.932	-0.4	-0.9	-0.4	-0.6	0.937	9	0	0	0	0	0	0	0	1	1	1	0	0	1	1	0	0	3	6	4	4	0	400	0	0	10	45	170	72	24.91	1	2	1	0	1	1	0	0	2	1
109	1.382	2.2	2.5	1.111	1.5	1.7	1.6	1.7	1.177	3	0	0	0	0	0	0	0	1	1	1	0	0	0	0	0	1	6	6	0	2	0	0	3.1	0	4	32	177	65	20.7	1	1	0	1	0	0	0	0	0	0
110	1.235	1.3	1.2	1.027	0.4	0.4	-0.2	-0.2	0.971	3	0	0	0	0	0	0	1	0	0	0	0	0	0	1	0	0	3	9	0	4	0	60	2.8	6	11	23	175	75	24.49	1	1	1	0	1	1	0	0	1	1
111	0.979	-1.1	-0.6	0.7	-1.9	-1.5	-1.5	-1.2	0.779	1	0	0	0	0	0	0	0	0	1	0	0	0	0	0	0	1	5	5	0	0	0	0	2.4	5	2	35	175	75	29.1	1	1	1	0	0	0	0	0	0	0
112	1.108	0.2	0.3	1.143	1.3	1.5	0.4	0.4	1.044	1	1	0	1	0	0	0	0	0	1	0	0	0	0	0	0	1	6	6	0	2	0	0	0	0	6	30	180	75	23.15	1	1	0	0	0	0	0	0	7	5
113	1.178	0.8	0.7	1.115	1.1	1	1.6	1.5	1.195	3	1	20	2	1	0	0	0	0	0	0	0	0	0	1	0	0	1	2	0	3	0	0	2.5	1	10	38	165	67	24.6	1	1	1	0	0	0	0	0	11	10
114	0.911	-1.5	-1.7	0.955	-0.2	-0.4	-0.9	-1	0.874	3	0	13	0	0	0	0	0	1	1	0	0	0	0	1	0	0	1	7	0	2	0	0	0.5	1	6	41	172	69.5	23.49	1	1	0	0	0	0	8	3	0	0
115	0.949	-1.1	-1.4	0.882	-0.7	-1	-1	-1.1	0.856	3	1	0	1	0	0	0	0	0	1	1	0	0	1	1	0	0	7	6	0	0	-1	0	2.6	0	2.5	29	168	68	24.09	1	1	0	0	0	0	0	0	0	0
116	1.122	0.3	0.3	0.881	-0.7	-0.7	-1.6	-1.6	0.78	3	0	0	0	0	0	0	0	0	1	1	0	0	0	1	0	1	2	6	0	2	0	0	2.7	4	7	47	160	70	35.1	0	1	0	1	0	0	20	20	0	0
117	0.911	-2.2	-2.8	0.882	-1.1	-1.6	-1.6	-2.2	0.809	5	1	5	1	1	0	0	0	0	0	1	0	0	0	0	0	0	4	6	0	0	0	0	0.9	2	4	38	180	80	36.1	1	1	0	0	0	0	0	0	3	3
118	0.982	0.2	0.1	0.838	-1.1	-1.2	-1.8	-1.8	0.762	5	0	0	0	0	0	0	0	0	0	0	0	0	0	0	0	1	6	3	0	0	0	0	0	7	8	35	160	75	35.49	1	1	0	0	0	0	7	5	1	1
119	0.987	0.7	0.9	1.133	1.2	1.3	0.8	0.8	1.09	1	0	0	0	0	0	0	0	0	1	1	0	0	0	1	0	0	3	3	0	4	0	0	0	5	12	22	169	72	25.2	1	1	0	0	0	0	0	0	0	0
120	1.032	0.2	-0.4	0.903	-0.2	-0.3	-0.4	-0.6	0.921	0	1	5	1	0	0	0	0	0	1	1	0	0	1	1	0	0	2.5	2	0	2	0	400	4.5	3	6	48	168	60	21.3	0	0	1	0	0	0	10	5	0	0
121	1.138	1.2	1	1.123	1.1	1	0.9	0.9	1.108	5	0	0	0	0	0	0	0	1	0	1	0	0	0	1	0	0	2	6	2	0	0	0	0	1		27	178	65	20.52	1	0	0	0	0	0	0	0	6	6
122	0.943	-1.2	-2.1	1.123	1.1	1	0.9	0.9	1.108	9	0	0	0	0	0	0	0	0	1	1	0	0	0	1	0	0	1	4	0	0	0	0	0	3		28	167	73	26.18	1	1	0	0	0	0	0	0	1	0
123	1.082	0	-0.4	0.849	-1	-1.4	-0.5	-0.7	0.923	9	0	0	0	0	0	0	0	1	1	0	0	0	0	1	0	0	2	1	4	4	0	0	2.3	3		21	175	78	25.47	1	1	0	1	0	0	0	0	1	0
124	1.152	0.5	0	0.859	-0.9	-1.1	-1.6	-1.7	0.78	3	0	0	0	0	0	0	0	1	0	1	0	0	0	0	0	1	2	6	0	0	0	0	2.4	1		29	158	50	34.1	1	2	0	0	0	0	0	0	2	0
125	1.211	0.8	1	0.859	-0.9	-1.1	-1.6	-1.7	0.78	3	1	3	1	1	0	0	0	0	1	1	0	0	0	0	0	1	3	6	4	4	0	300	6.3	0		27	178	70	37.1	1	2	1	0	1	1	3	0	2	0
126	1.041	-0.3	0	0.784	-1.5	-0.9	-1.7	-1.4	0.743	1	1	3	0	0	0	0	0	0	1	0	0	0	0	0	0	1	6	9	4	4	0	100	3.4	2		25	160	57.5	22.46	1	1	0	0	1	1	1	0	1	0
127	1.152	0.5	0	0.865	-0.9	-0.7	0	-0.1	0.988	1	0	0	0	0	0	0	1	0	0	0	0	0	0	0	0	0	3	5	0	2	0	0	0.8	2		41	179	80	31.1	1	1	1	1	0	0	0	0	15	10
128	1.431	2.9	3.1	0.785	-1.5	-0.6	-1.8	-1.5	0.752	3	1	4	1	1	0	0	0	0	1	0	0	0	1	1	0	0	5	6	0	4	0	0	2.4	0		50	165	71	26.08	1	1	1	0	1	1	20	3	29	29
129	0.962	-0.1	-0.8	0.674	-2.1	-0.1	-2	-0.4	0.716	3	0	0	0	0	0	0	0	1	1	0	0	0	0	0	0	1	6	2	0	0	0	0	3.1	0		37	176	75	24.21	0	1	0	0	0	0	0	0	0	0
130	1.091	0.1	0.1	0.791	-1.4	-1	-1.6	-1.5	0.781	3	1	1	0	0	0	0	0	0	1	0	0	0	0	1	0	0	1	7	0	2	0	20	1.1	4		36	170	63	21.8	1	1	1	0	0	0	0	0	20	19
131	1.171	0.7	1	0.842	-1	-1	-1.4	-1.4	0.813	3	0	0	0	0	0	0	0	0	0	1	0	0	0	0	0	1	1	6	0	3	0	0	0.4	1		36	173	80	26.73	1	1	0	0	1	1	10	5	0	0
132	0.938	-0.8	-1.1	0.848	-1	-1.4	-0.5	-0.7	0.928	5	0	0	0	0	0	0	0	0	0	1	0	0	0	0	0	1	7	6	0	2	0	30	3.7	3		31	172	94	40.1	1	1	0	0	0	0	0	0	32	31
133	0.976	-0.6	0.9	0.836	-0.7	-0.2	-0.1	0.1	1.018	5	0	0	0	0	0	0	0	0	1	1	0	0	0	1	0	0	2	6	0	0	-1	0	0.8	0		39	170	80	27.68	1	1	0	0	0	0	0	0	2	0
134	0.871	-0.8	-1.2	0.791	-1.4	-1	-1.6	-1.5	0.781	1	0	0	0	0	0	0	0	0	1	0	0	0	0	1	0	0	4	3	0	2	0	0	0.9	0		49	171	78	26.67	1	1	1	1	1	1	10	10	1	0
135	1.066	-1.1	-0.7	1.076	0.8	0.7	0.7	0.6	1.077	0	0	0	0	0	0	0	0	0	1	1	0	0	1	1	0	0	6	3	0	0	0	0	0.7	6		37	176	76	24.54	1	1	0	0	0	0	0	0	10	7
136	1.193	-0.1	0.4	1.113	1	1	1.2	1.2	1.153	5	0	0	0	0	0	0	0	0	0	1	0	0	0	1	0	1	3	2	0	0	0	20	0.5	5		29	168	79	31.1	1	1	0	0	0	0	0	0	2	0
137	0.891	-1	-0.2	0.84	-1.1	-0.8	-0.2	-0.2	0.967	5	0	0	0	0	0	0	0	0	0	1	0	0	0	0	0	0	1	5	0	4	0	60	0.1	0		41	168	73	25.86	1	0	1	0	1	1	10	10	1	0
138	0.954	-0.6	-1.4	0.986	0.1	0.1	-0.3	-0.2	0.954	1	1	0	0	0	0	0	0	0	1	1	0	0	0	0	0	1	1	6	0	2	0	0	4.6	1		29	178	81	40.1	1	1	0	0	1	1	1	0	0	0
139	0.897	-0.5	-0.7	0.892	-0.3	0.4	-0.1	0.5	0.963	0	0	0	0	0	0	0	0	0	0	0	0	0	0	1	0	0	7	2	0	3	0	0	6.7	1		45	158	49	19.63	0	1	0	1	0	0	0	0	18	15
140	0.968	-1.4	-1	0.79	-1.4	-1	-1.3	-1.3	0.817	3	0	0	0	0	0	0	0	0	1	1	0	0	1	1	0	0	2	7	0	2	0	30	0.7	0		43	183	100.5	32.1	1	1	1	0	1	1	7	2	10	0
[truncated: 16 more columns]
